# Supplementary material for: Meta-analysis of northeast Atlantic marine taxa shows contrasting phylogeographic patterns following post-LGM expansions
Source: PeerJ journal article supplement (doi:10.7717/peerj.5684), 2018-09-28
Supplement: Figure_S2_Haplotype_Networks.pdf [file Figure_S2_Haplotype_Networks.pdf]

# Haplotype networks for all 21 species used in the meta-analysis

## Figure S2, Supporting Information

Tom Jenkins

March 12, 2018

### List of Figures

|    |                               |    |
|----|-------------------------------|----|
| 1  | <i>Carcinus maenas</i>        | 1  |
| 2  | <i>Celleporella hyalina</i>   | 2  |
| 3  | <i>Cerastoderma edule</i>     | 3  |
| 4  | <i>Conger conger</i>          | 4  |
| 5  | <i>Dicentrarchus labrax</i>   | 5  |
| 6  | <i>Labrus bergylta</i>        | 6  |
| 7  | <i>Macoma balthica</i>        | 7  |
| 8  | <i>Maja brachydactyla</i>     | 8  |
| 9  | <i>Modiolus modiolus</i>      | 9  |
| 10 | <i>Nassarius nitidus</i>      | 10 |
| 11 | <i>Nassarius reticulatus</i>  | 11 |
| 12 | <i>Neomysis integer</i>       | 12 |
| 13 | <i>Owenia fusiformis</i>      | 13 |
| 14 | <i>Pomatoschistus microps</i> | 14 |
| 15 | <i>Pomatoschistus minutus</i> | 15 |
| 16 | <i>Palinurus elephas</i>      | 16 |
| 17 | <i>Pectinaria koreni</i>      | 17 |
| 18 | <i>Pelvetia canaliculata</i>  | 18 |
| 19 | <i>Raja clavata</i>           | 19 |
| 20 | <i>Solea solea</i>            | 20 |
| 21 | <i>Symphodus melops</i>       | 21 |

# *Carcinus maenas*

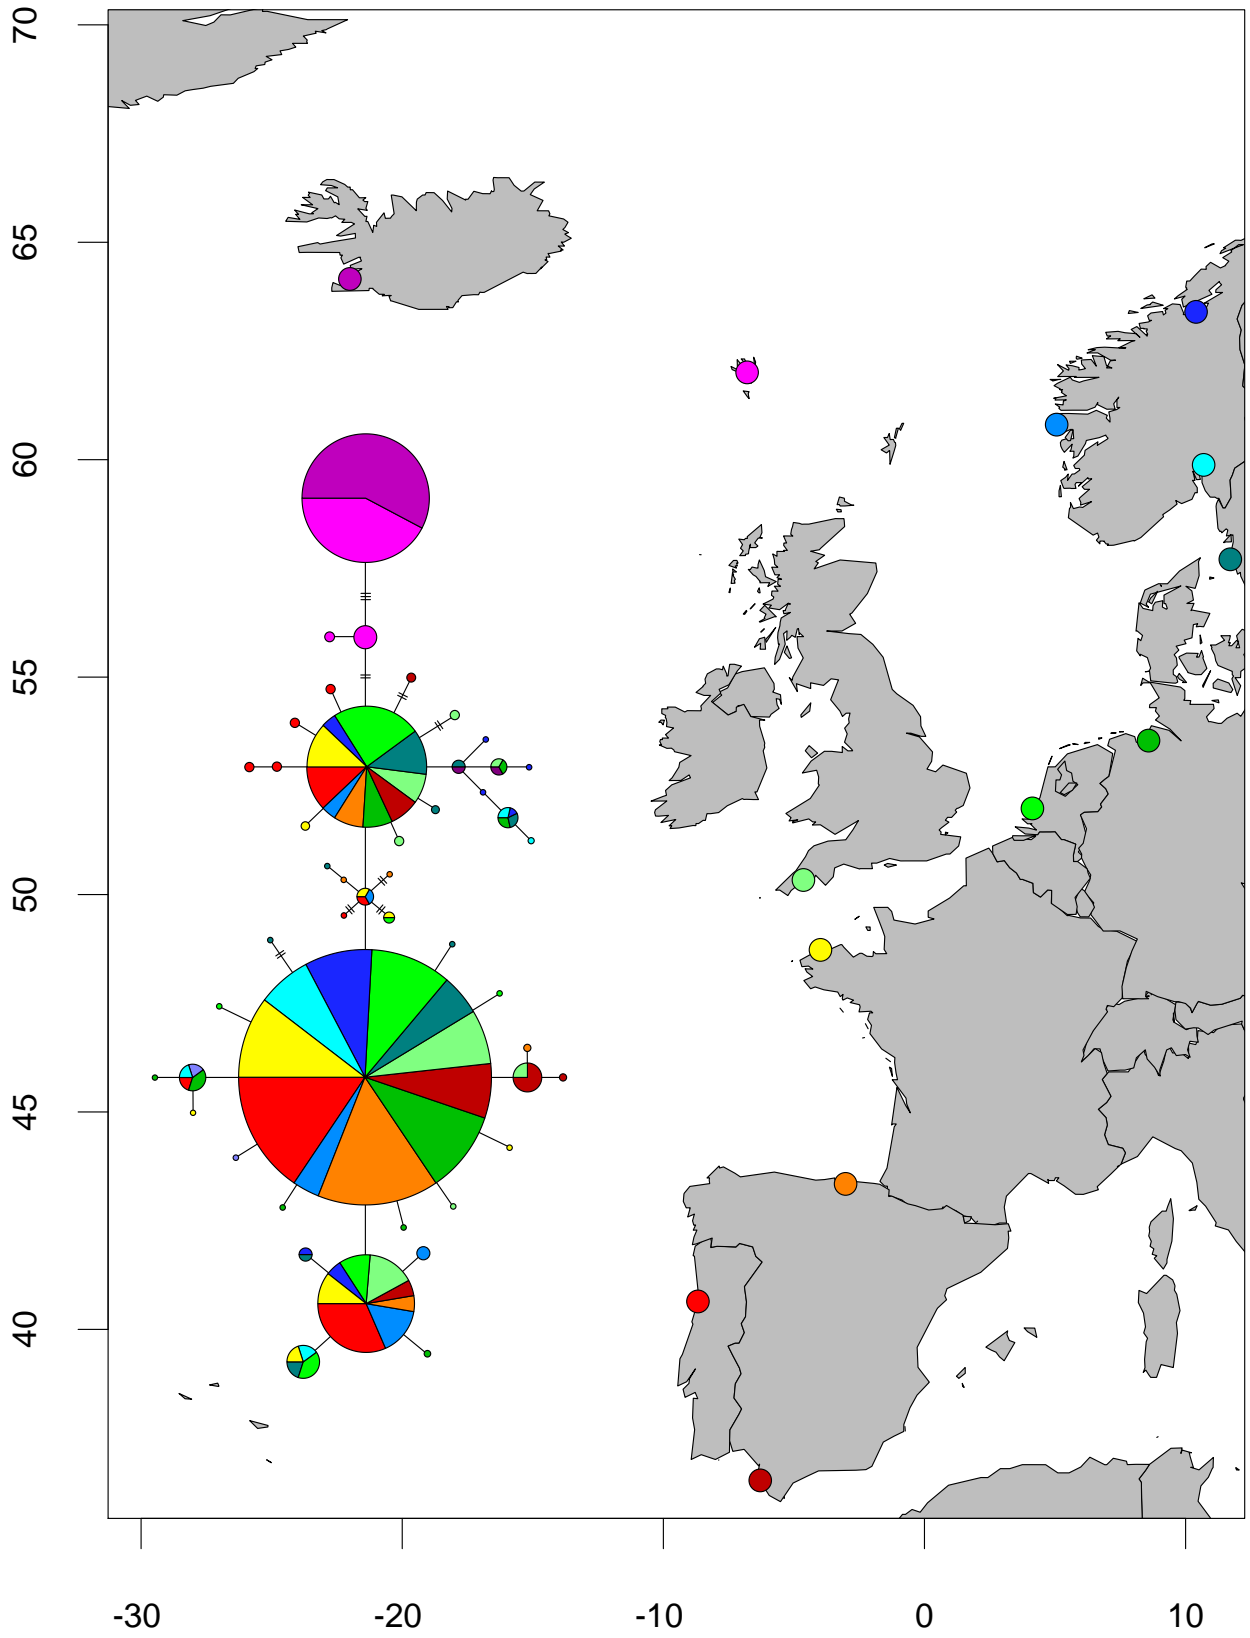

Figure 1

*Celleporella hyalina*

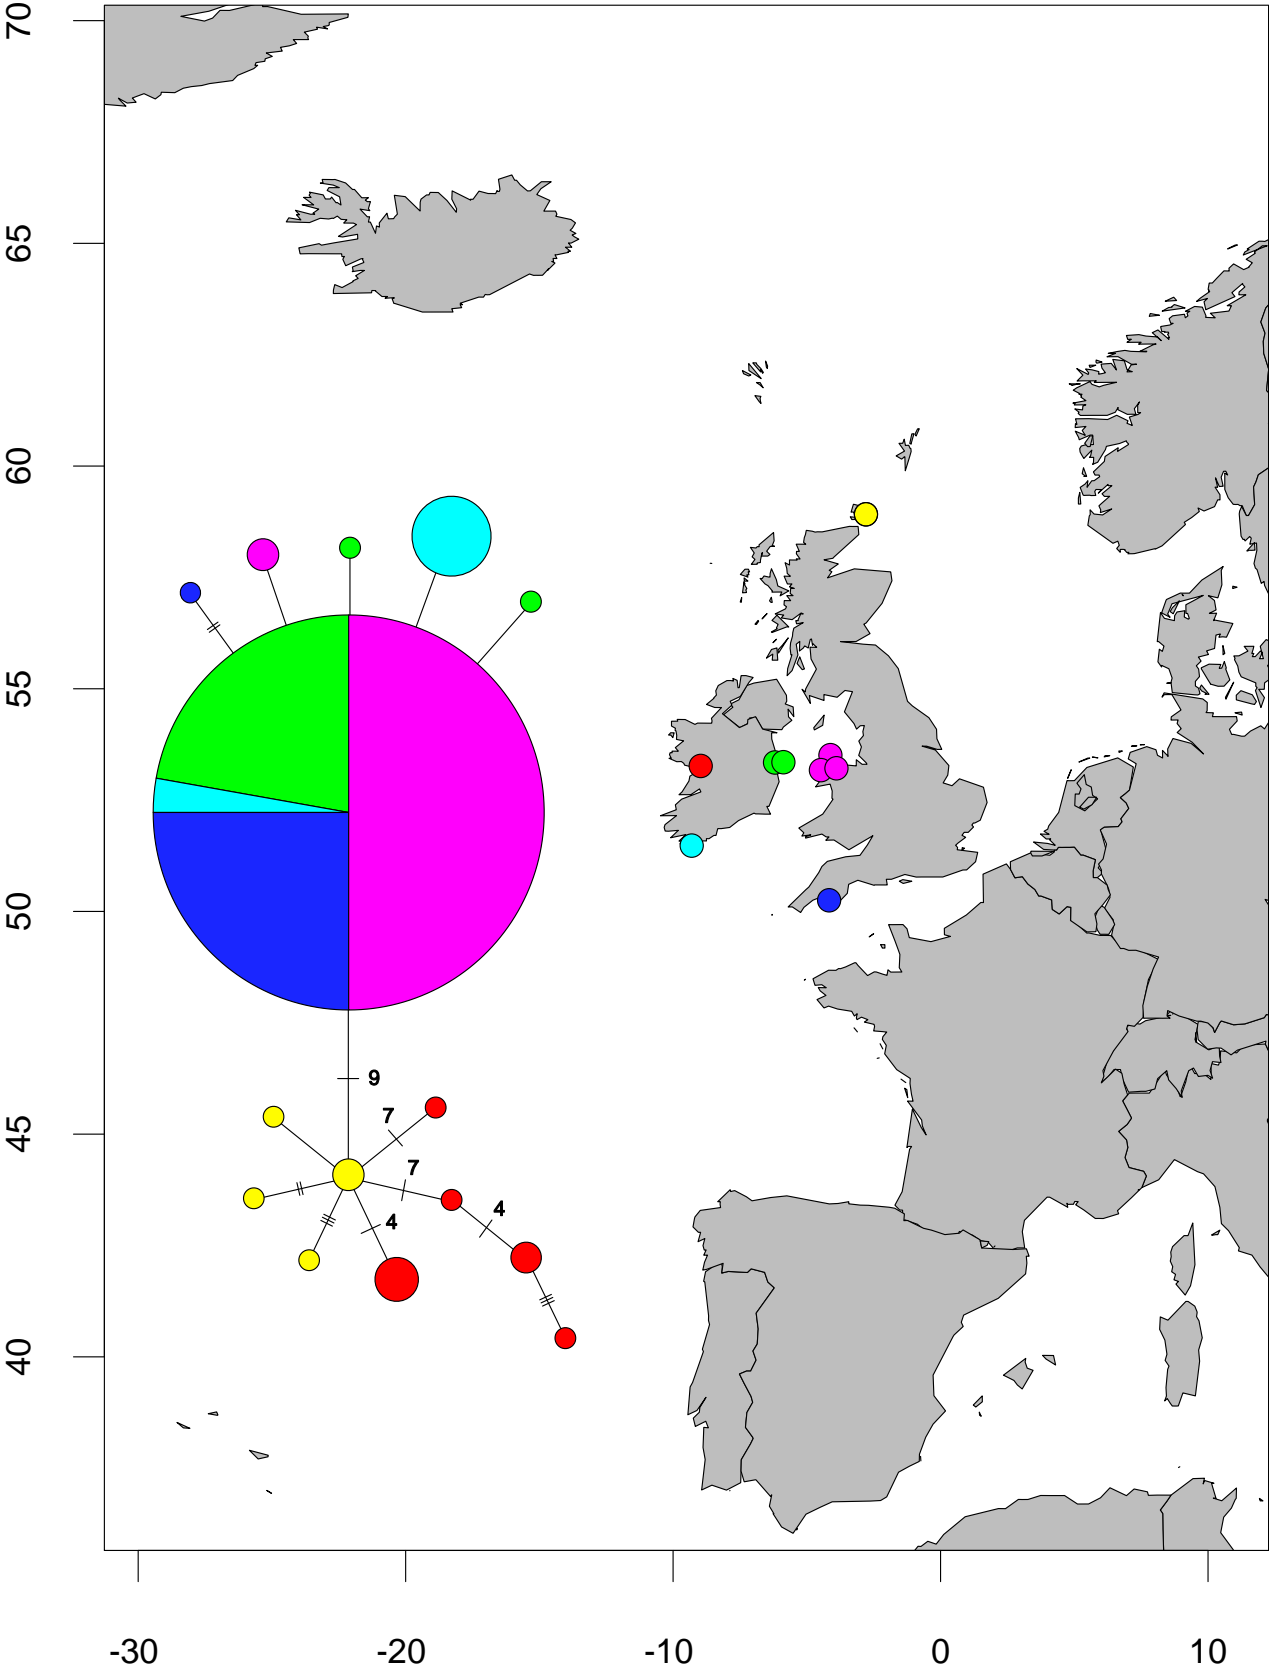

Figure 2

*Cerastoderma edule*

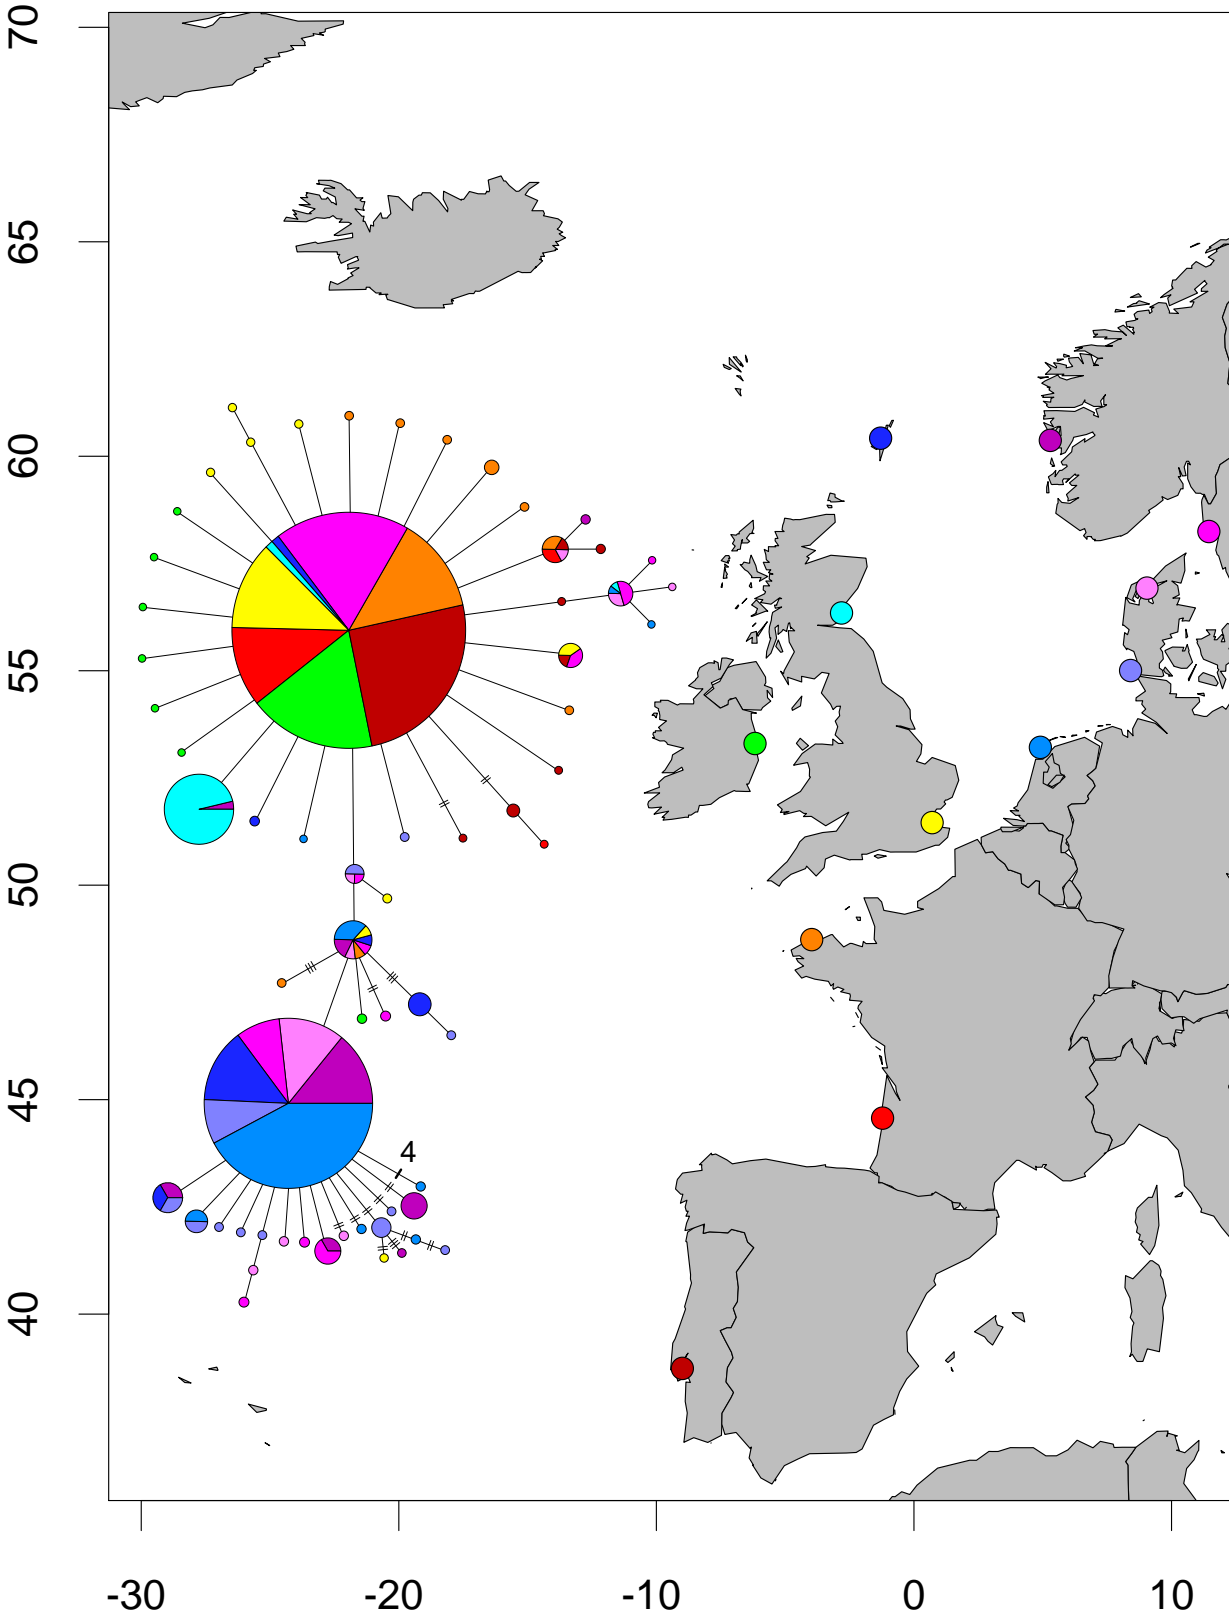

Figure 3

# *Conger conger*

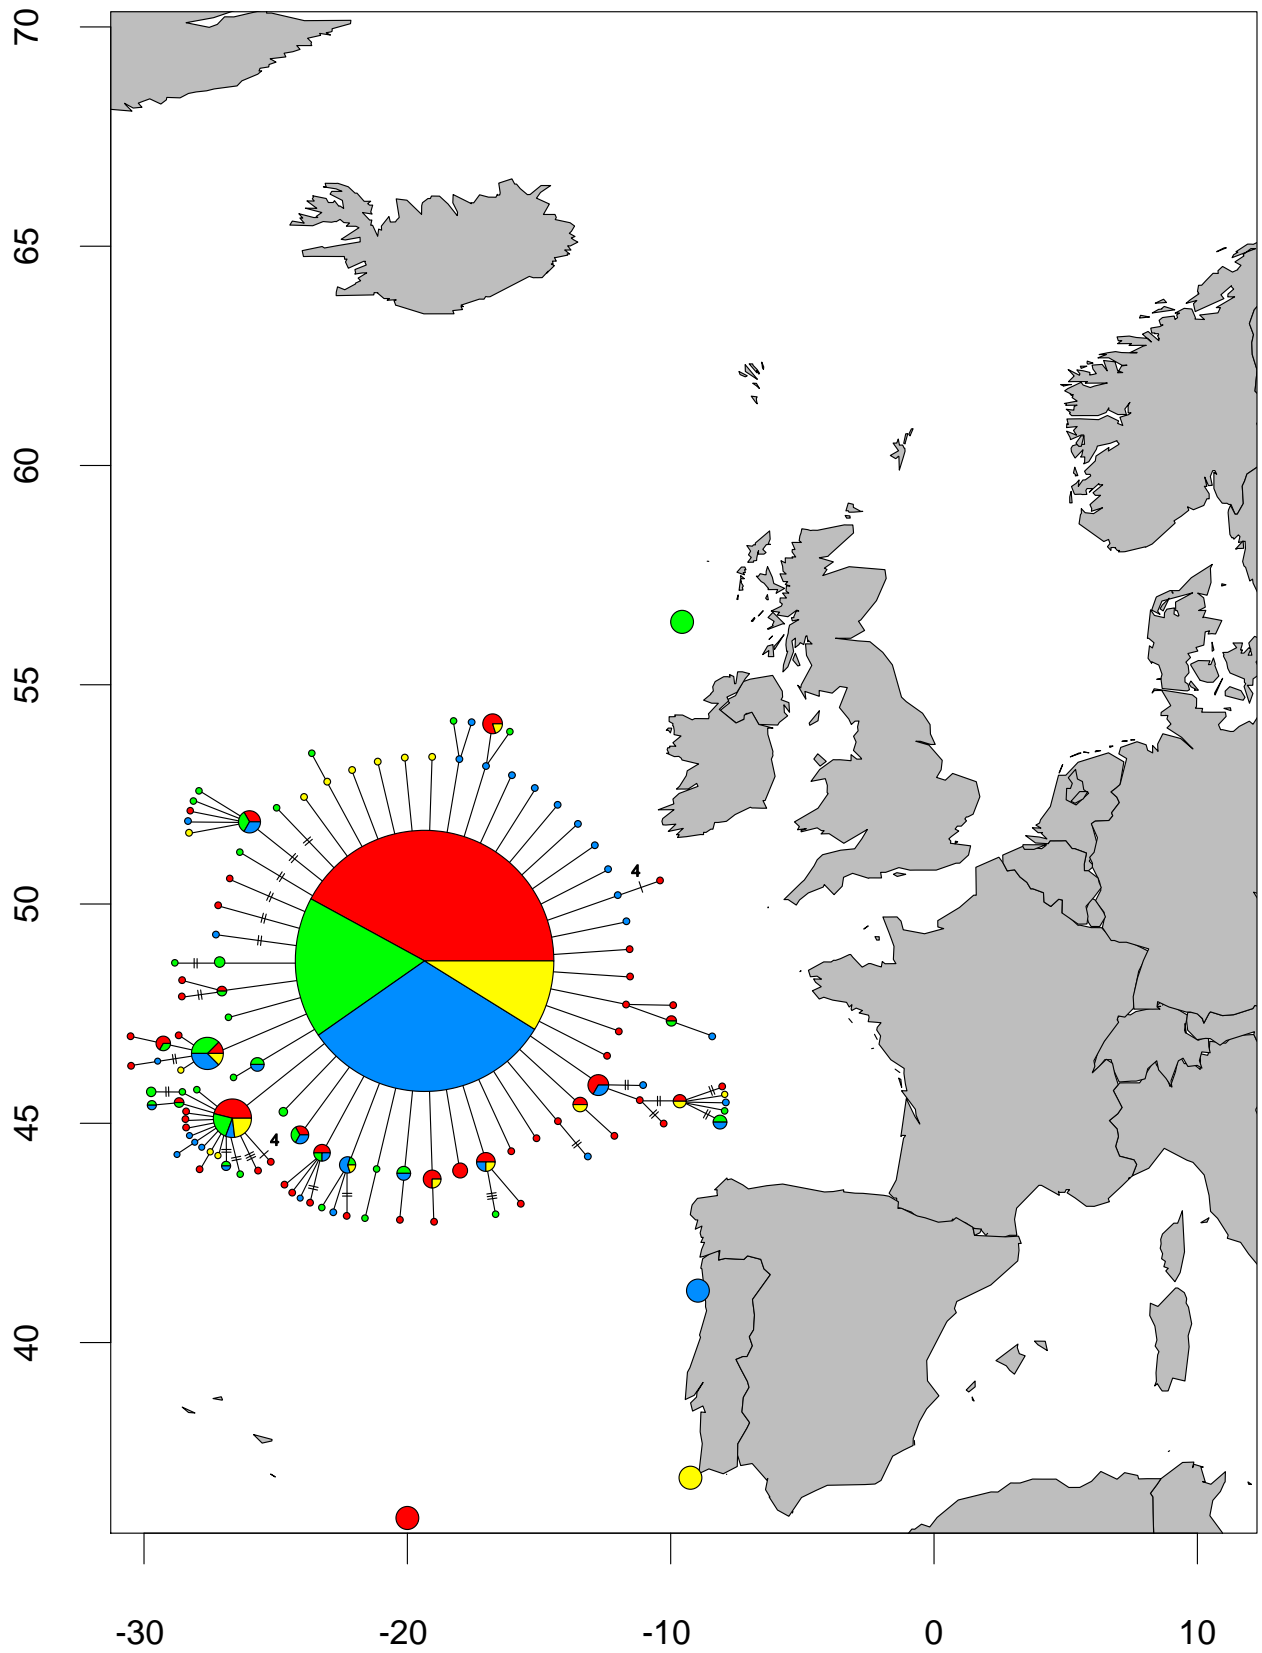

Figure 4

# *Dicentrarchus labrax*

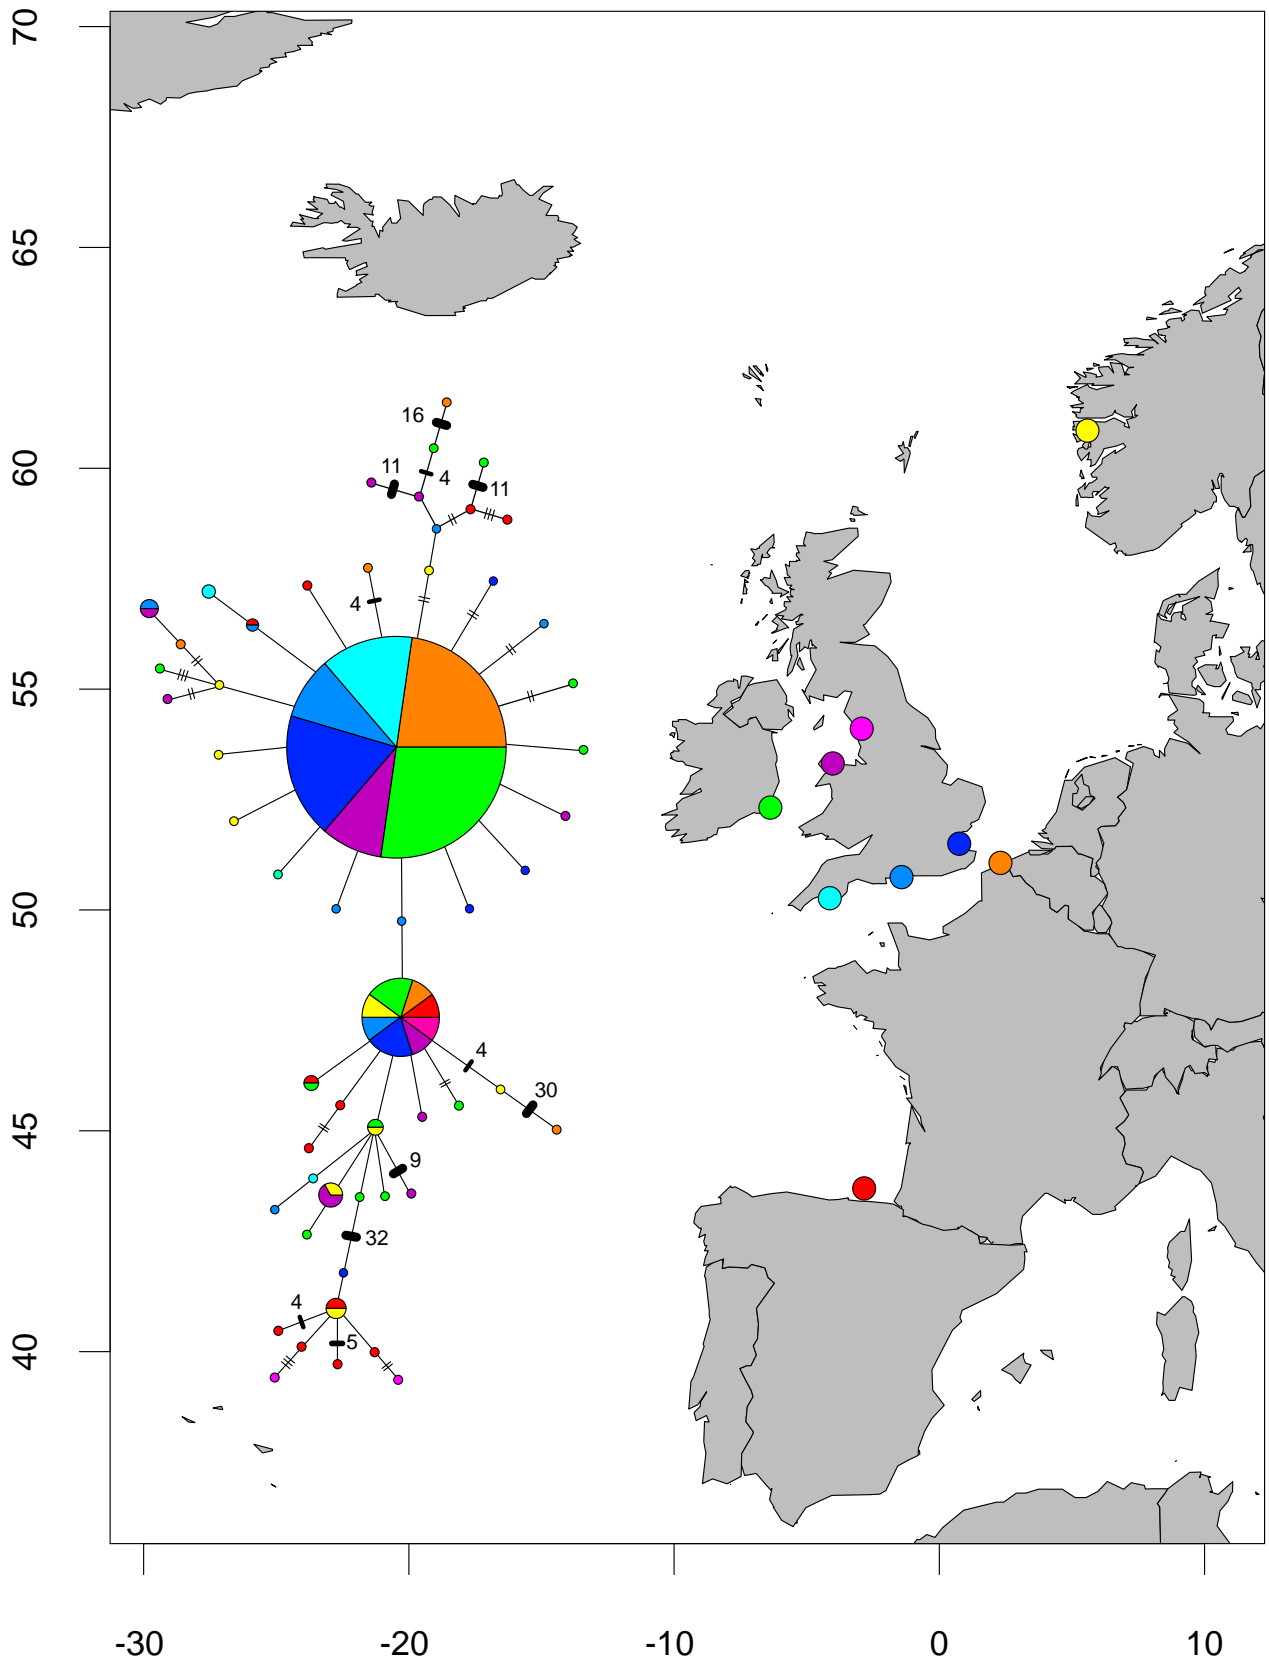

Figure 5

# *Labrus bergylta*

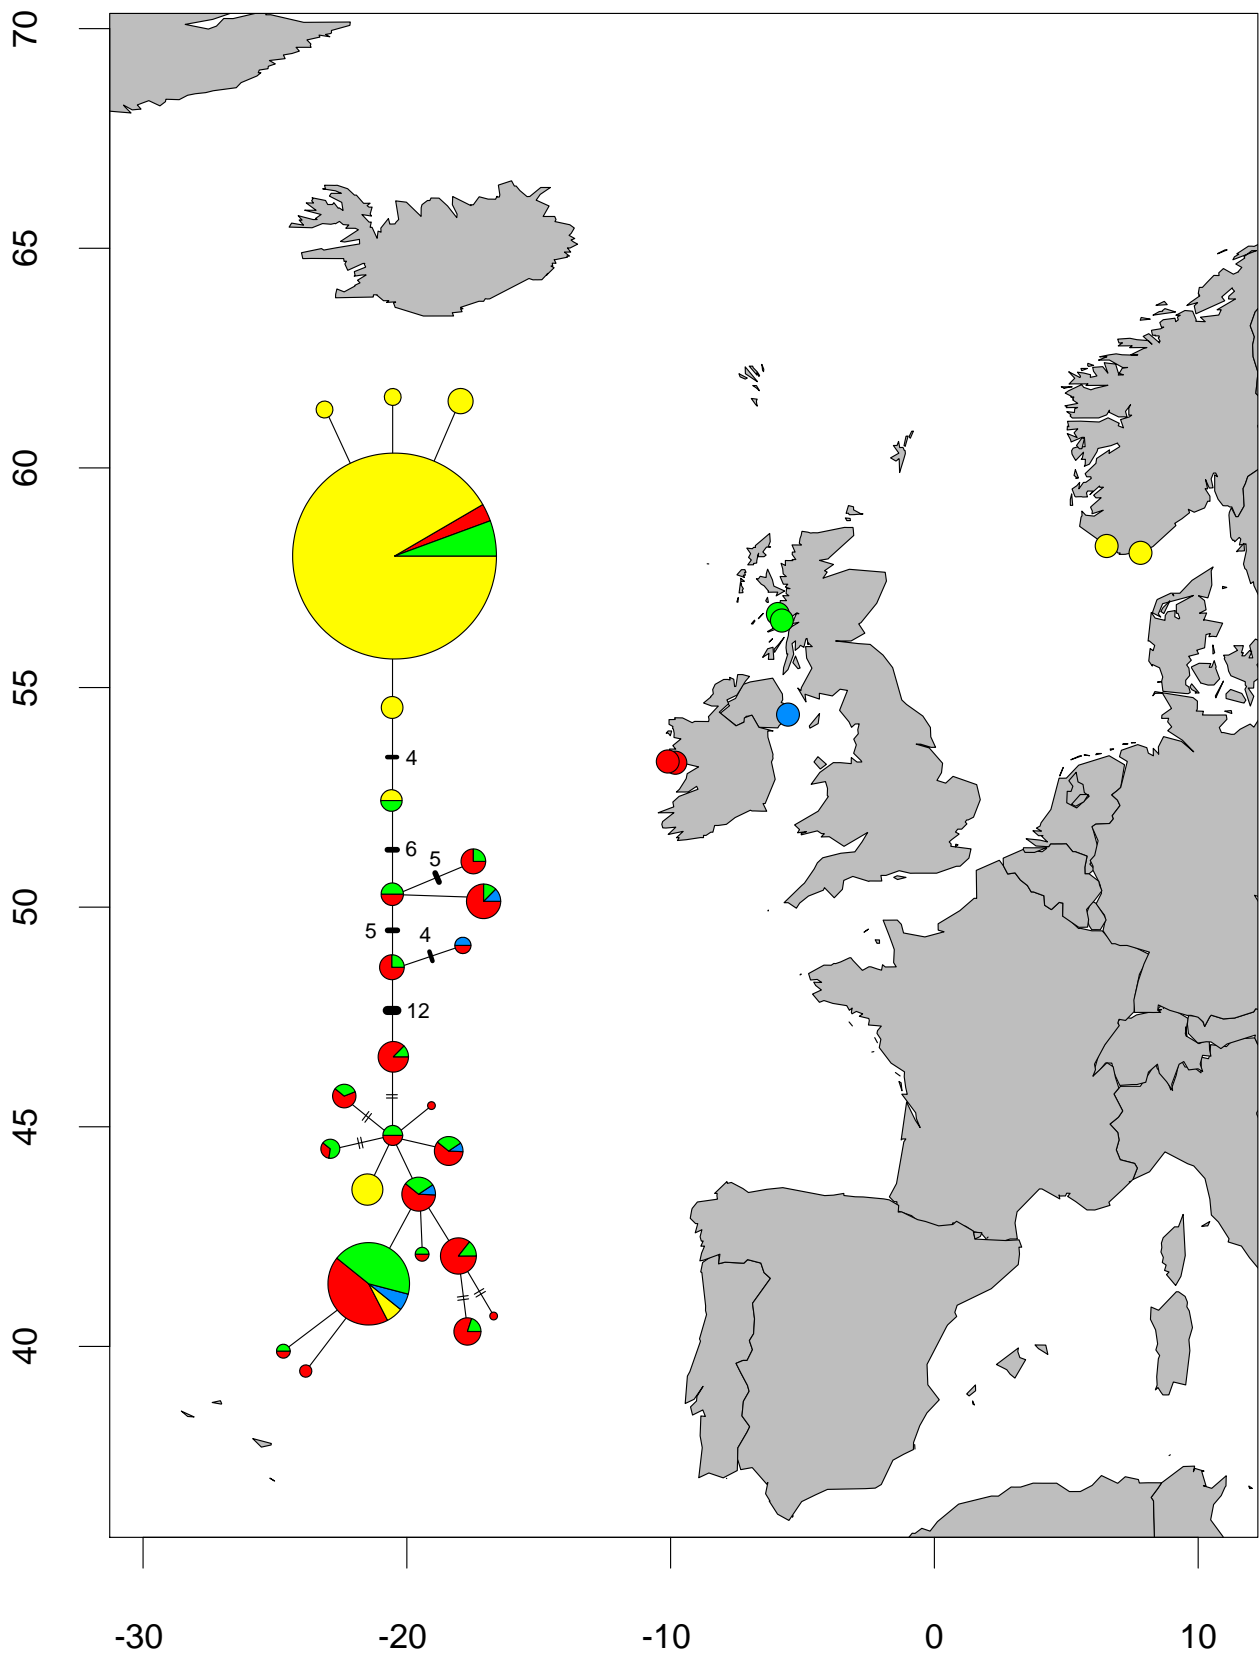

Figure 6: Only haplotypes represented by more than one sequence are shown.

*Macoma balthica*

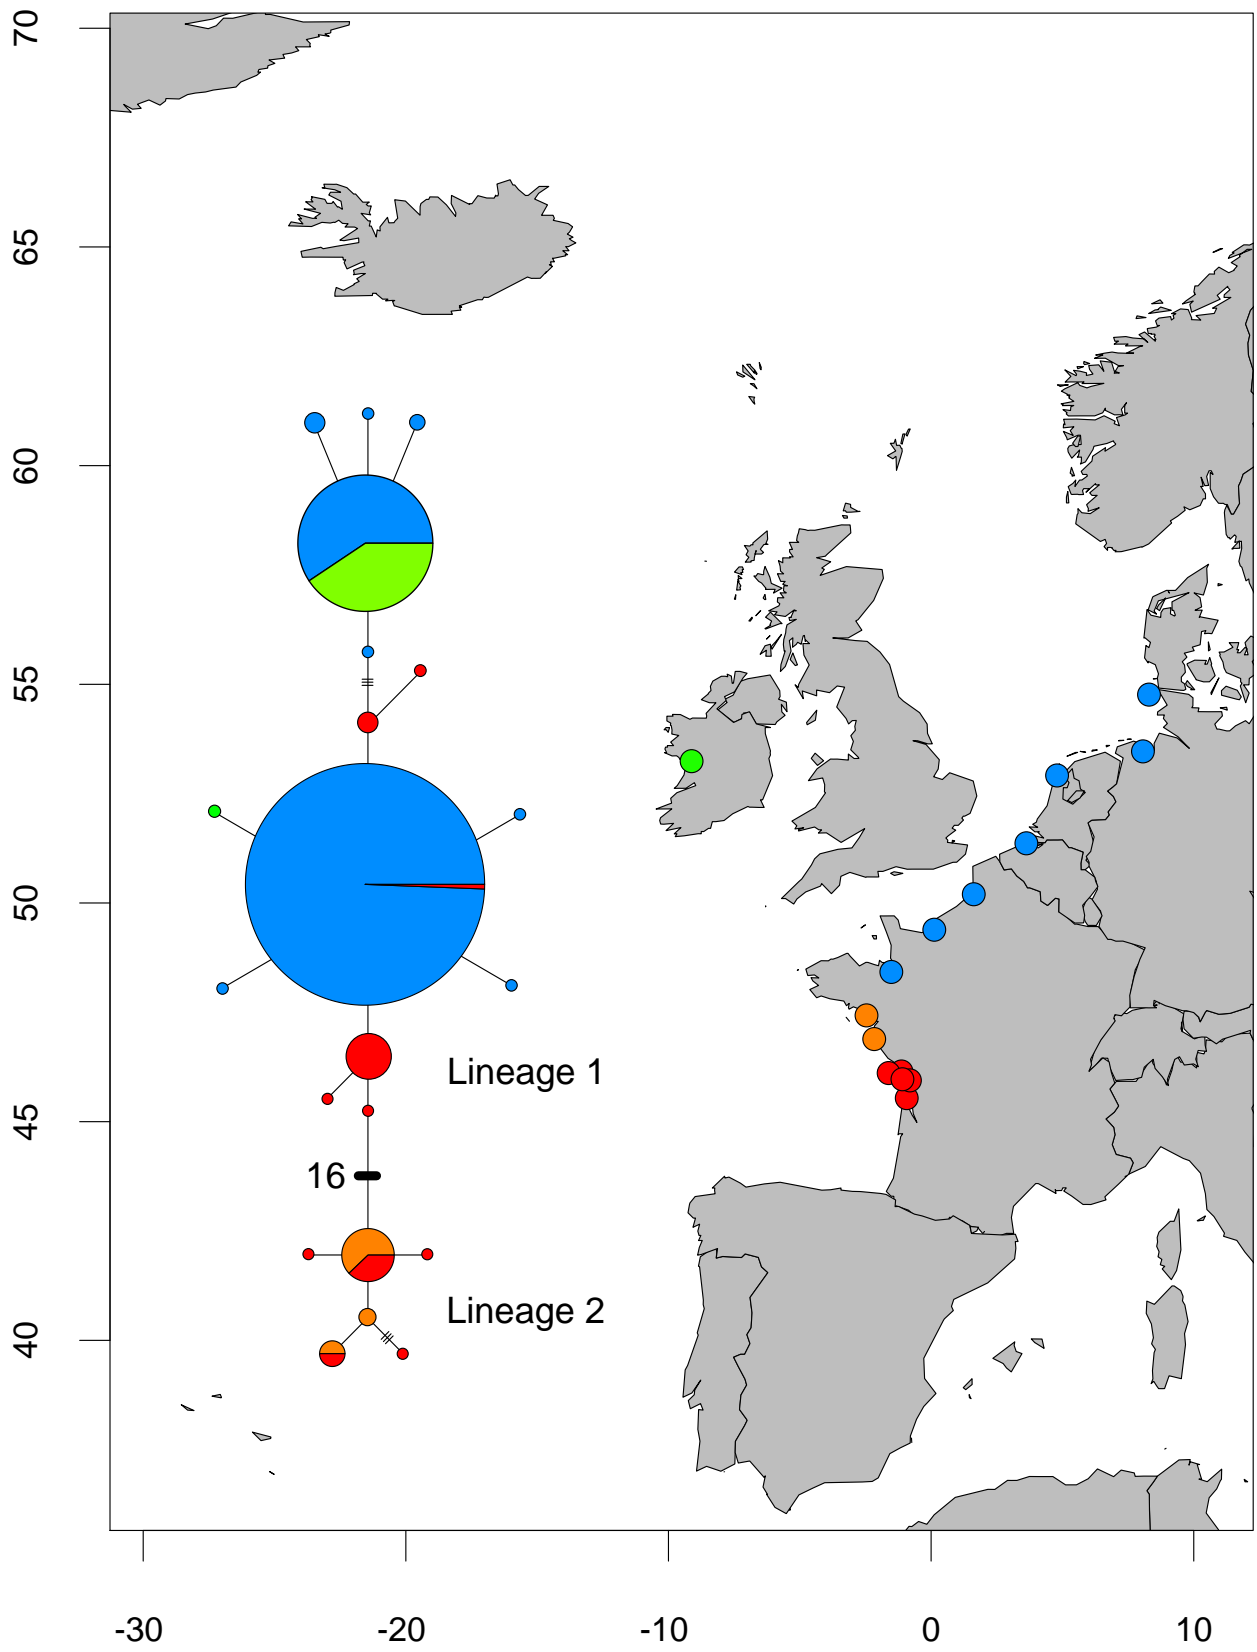

Figure 7



*Maja brachydactyla*

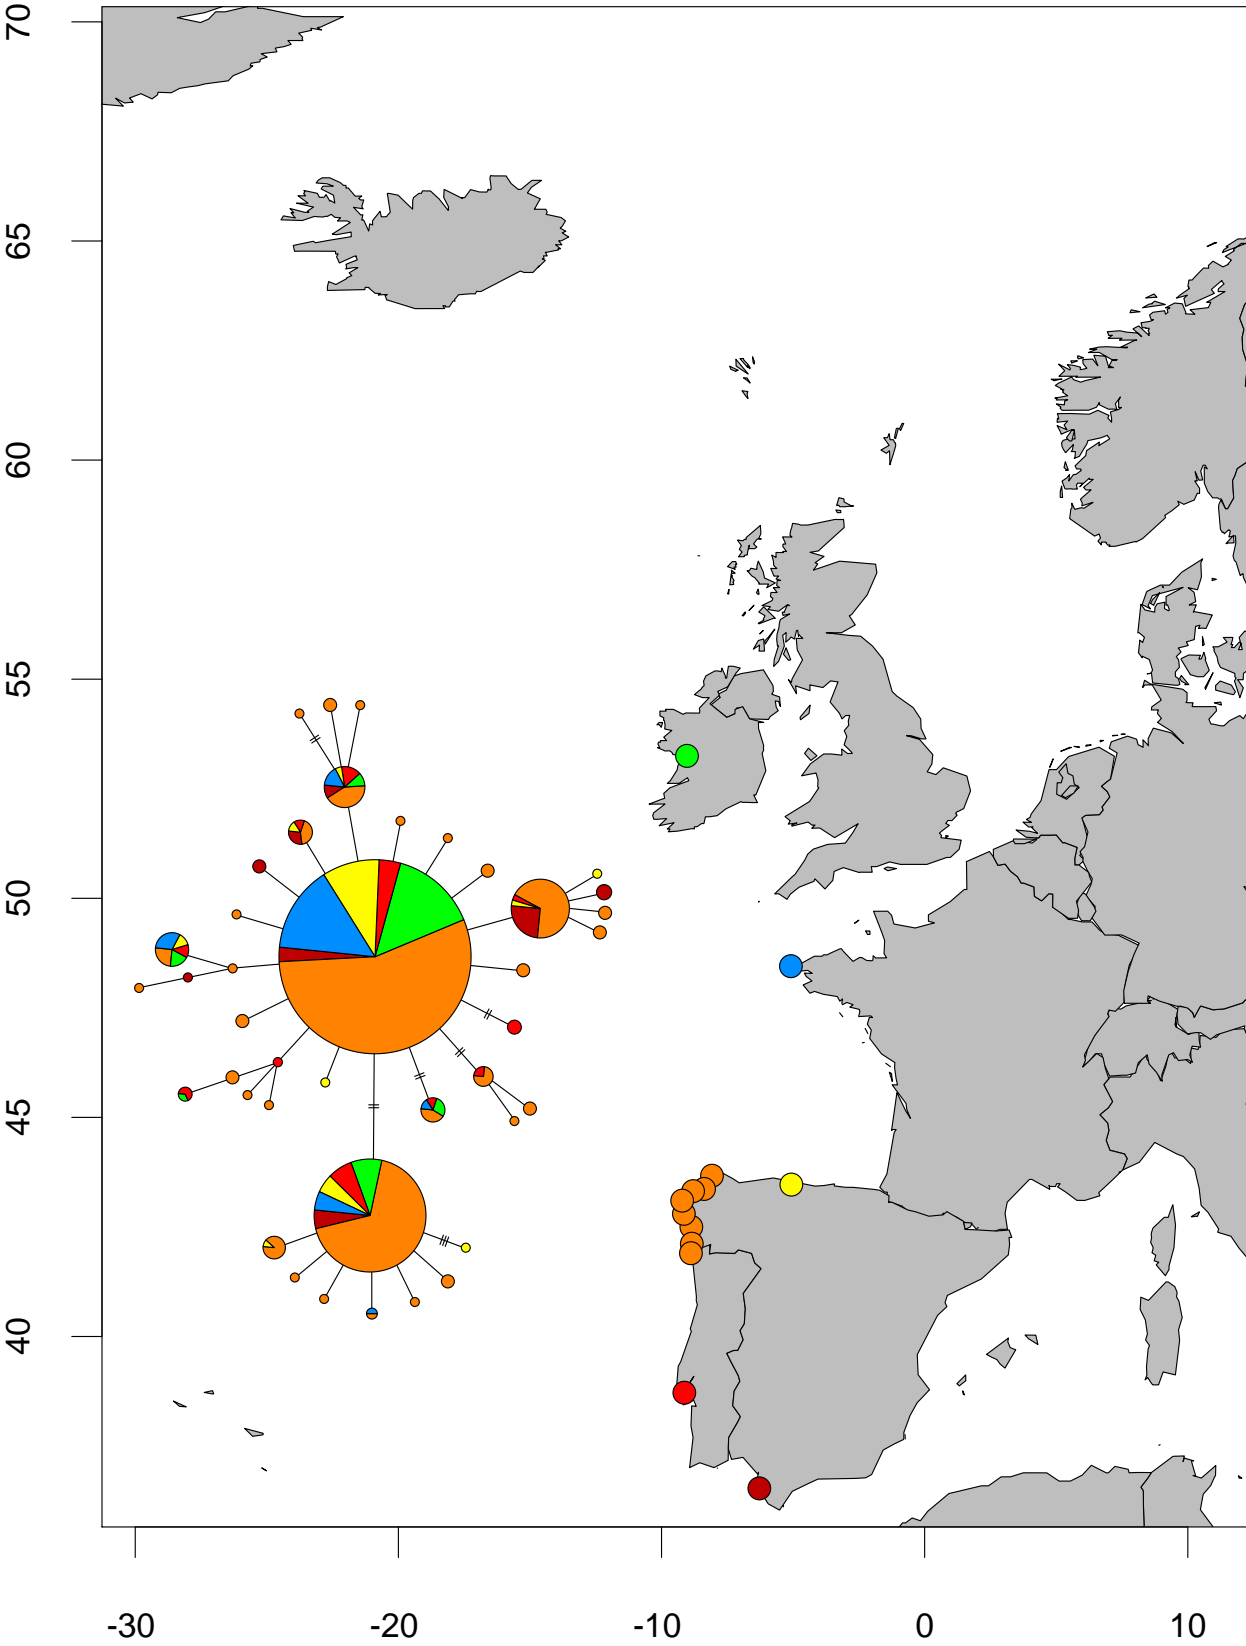

Figure 8

# *Modiolus modiolus*

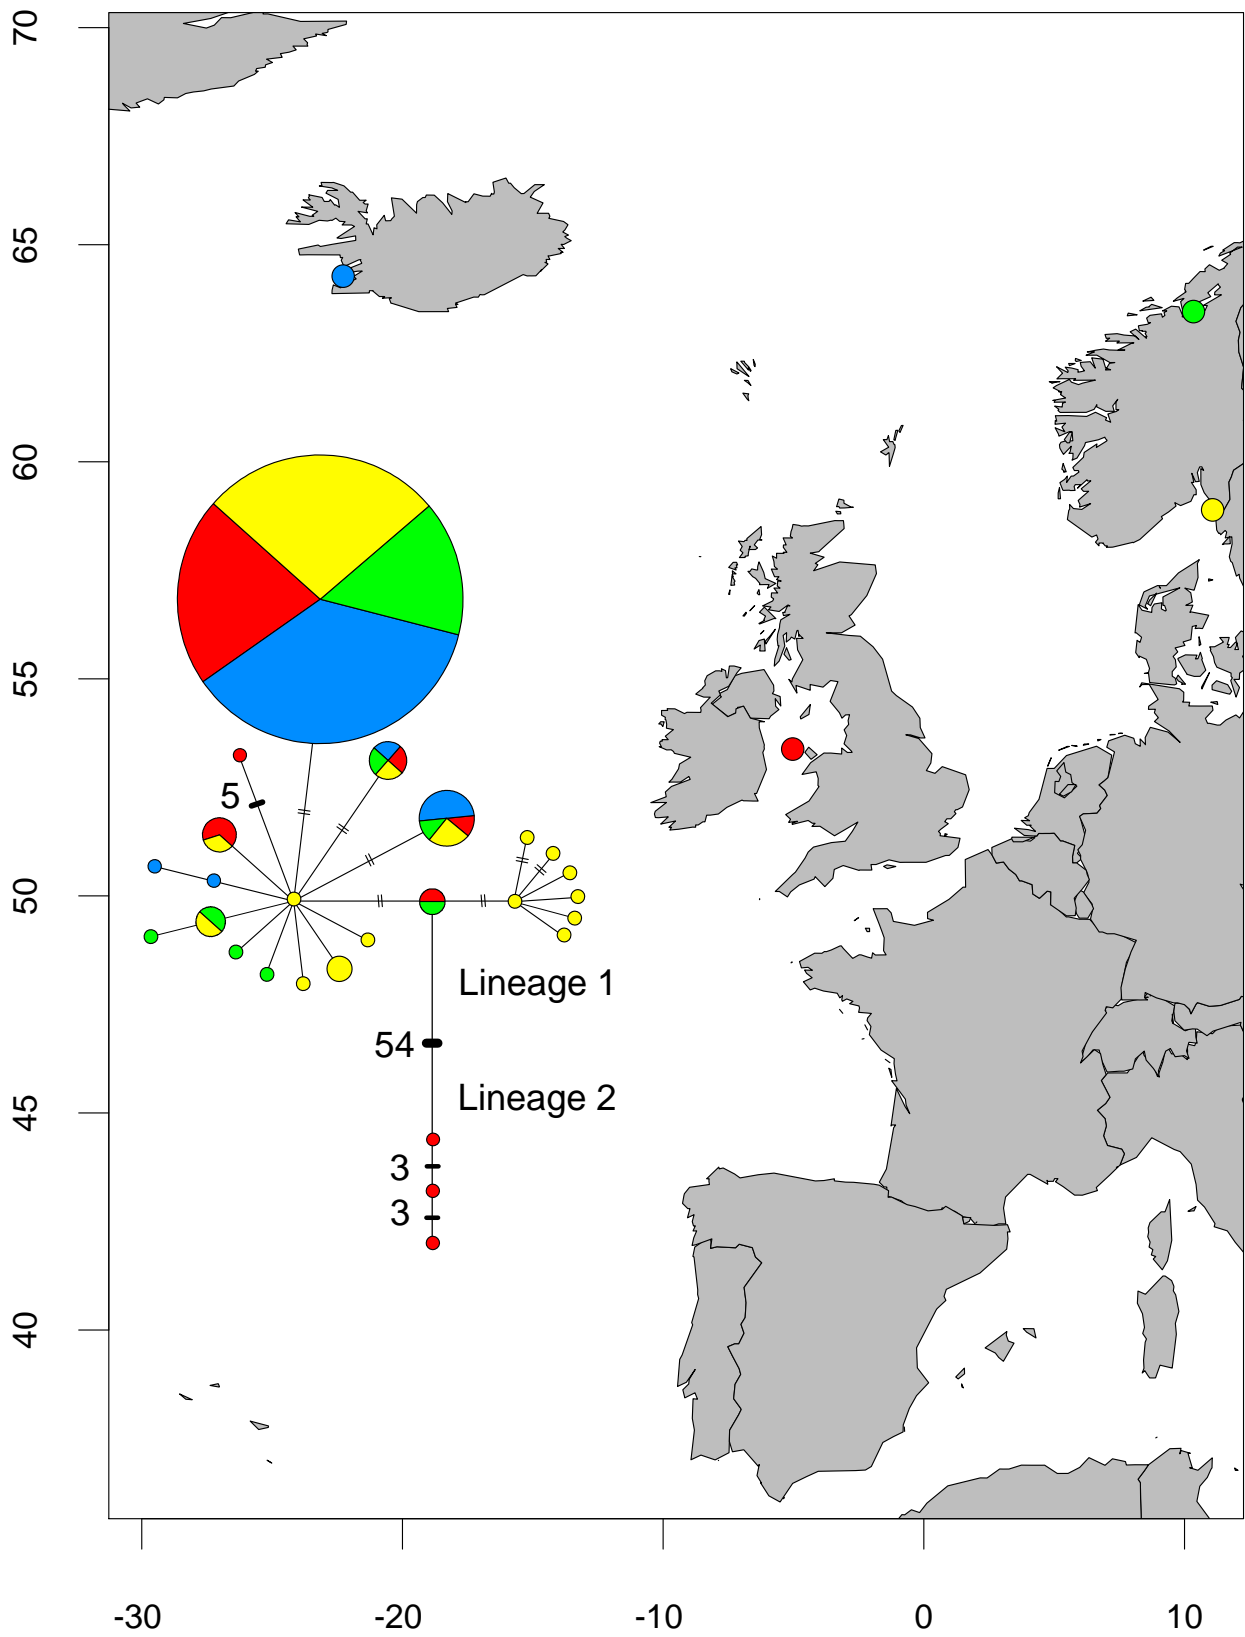

Figure 9

*Nassarius nitidus*

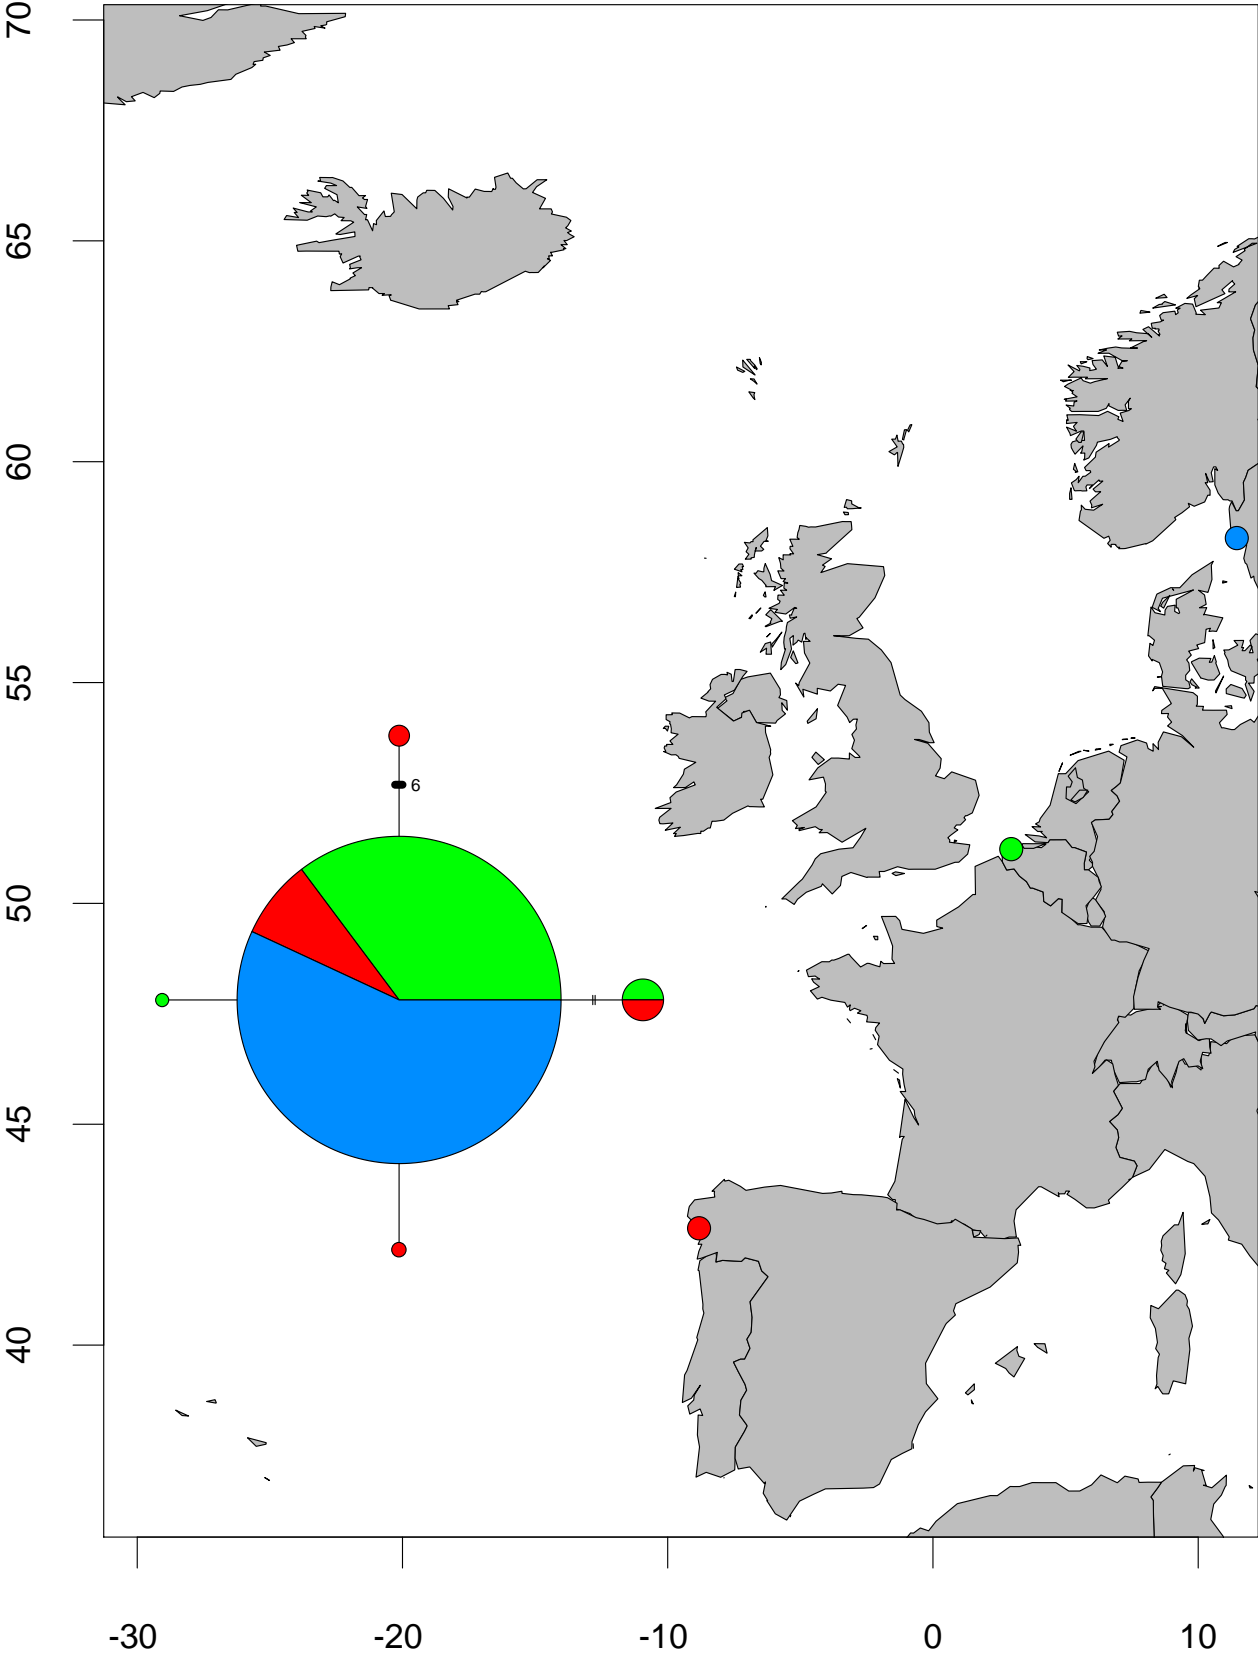

Figure 10

*Nassarius reticulatus*

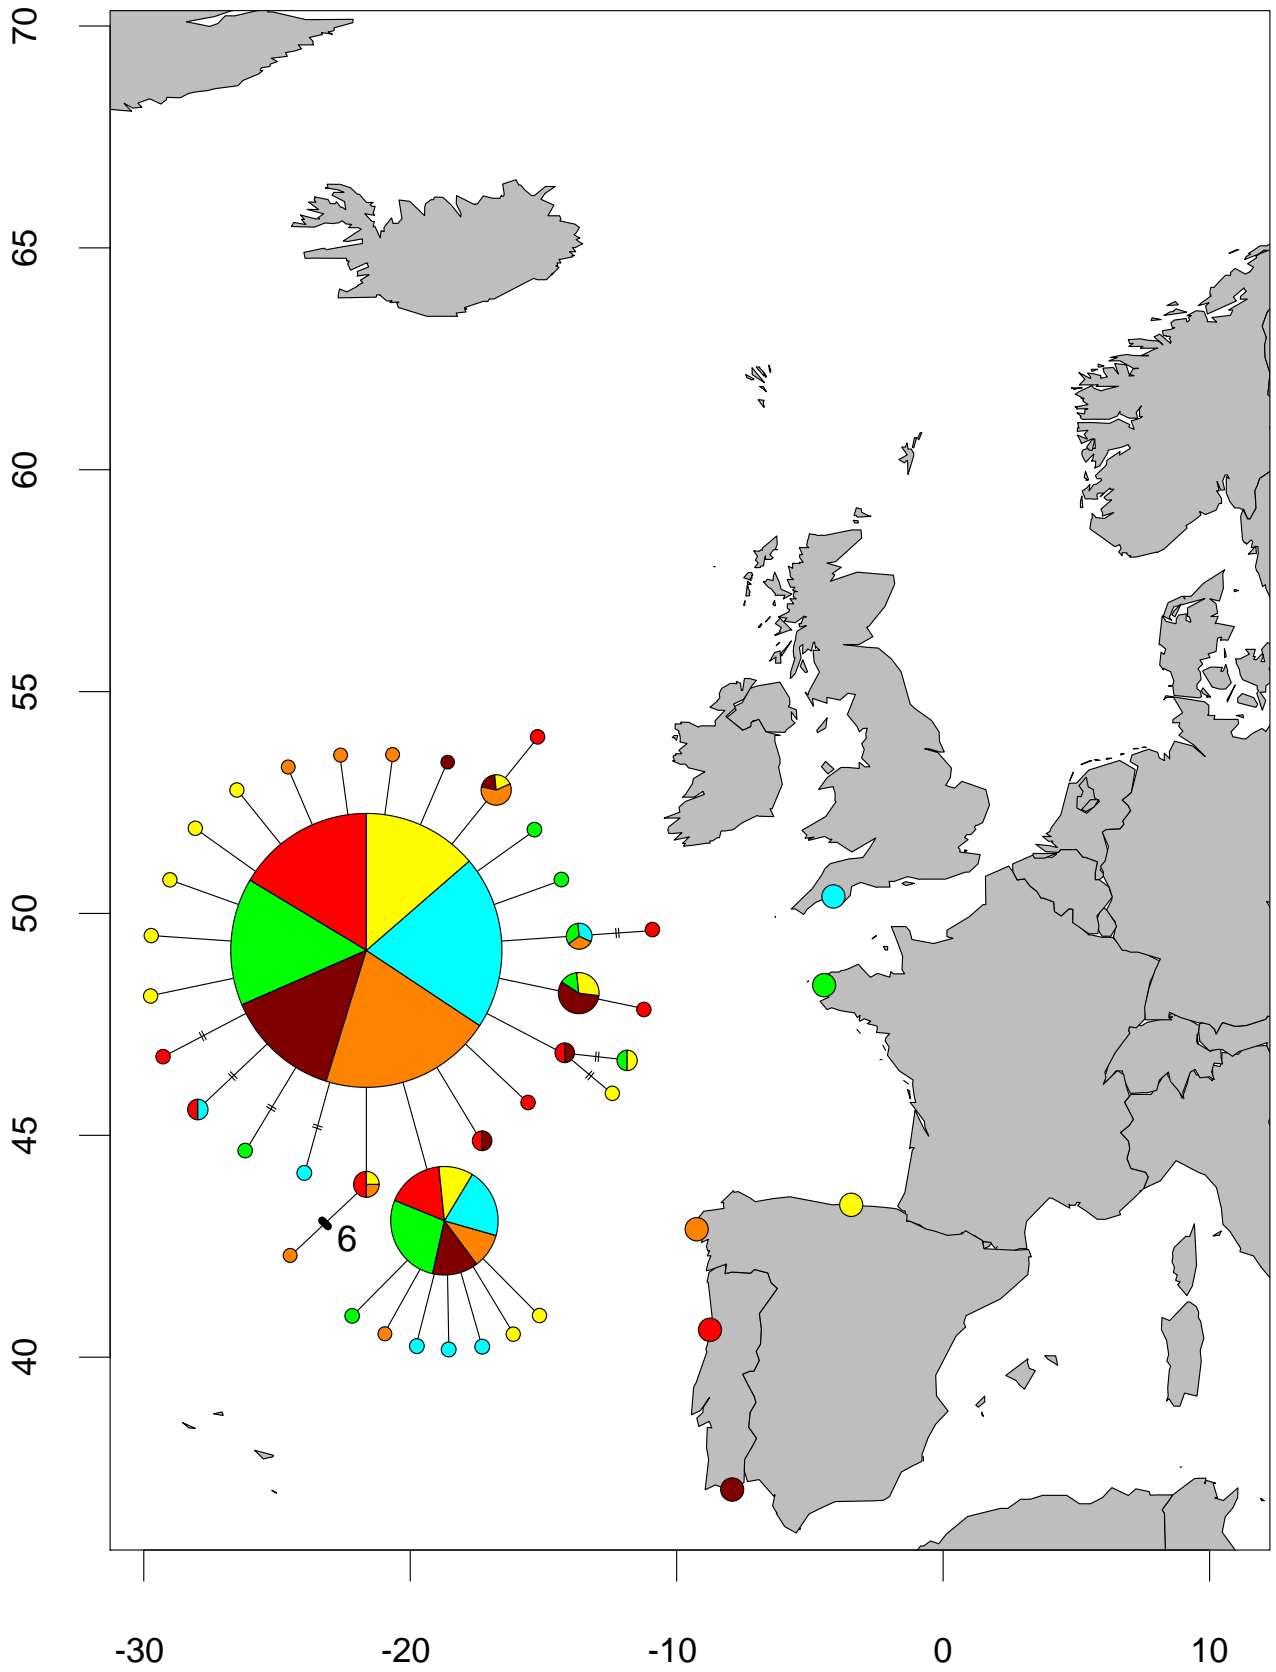

Figure 11

# *Neomysis integer*

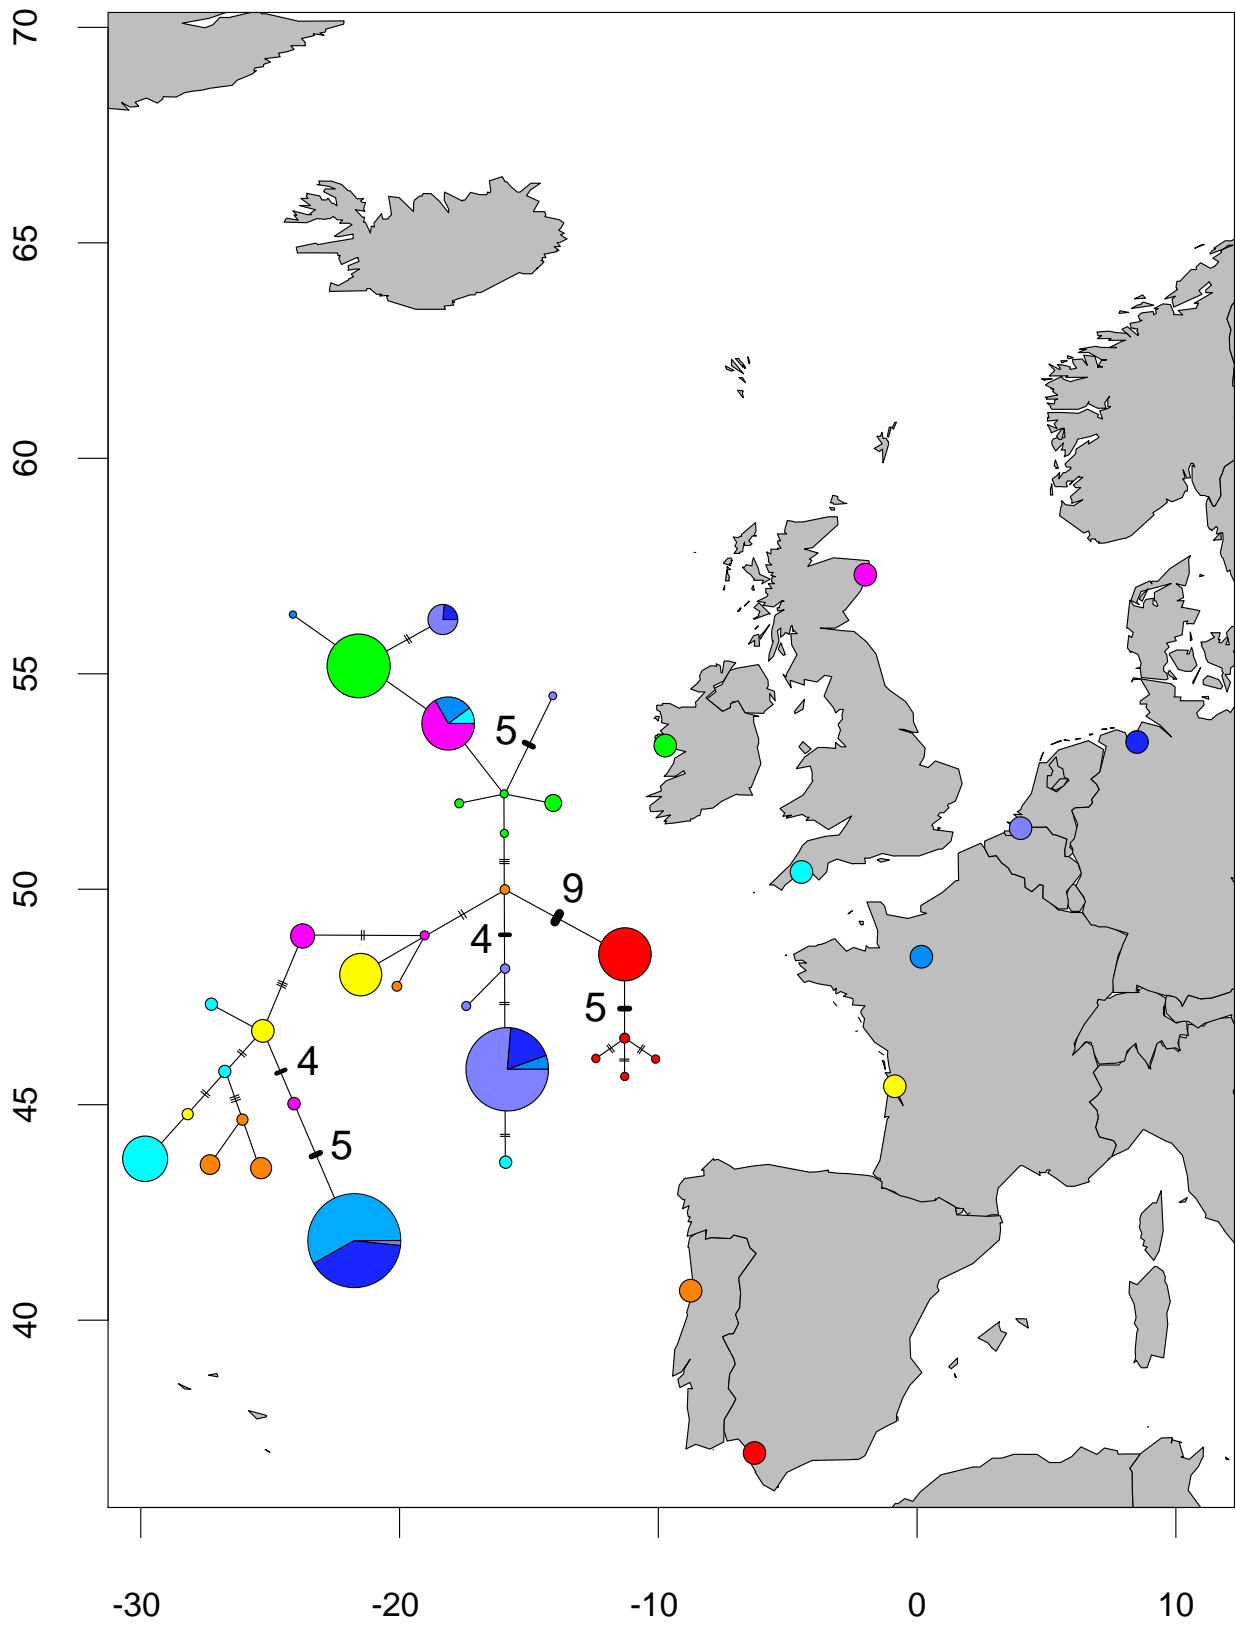

Figure 12

# *Owenia fusiformis*

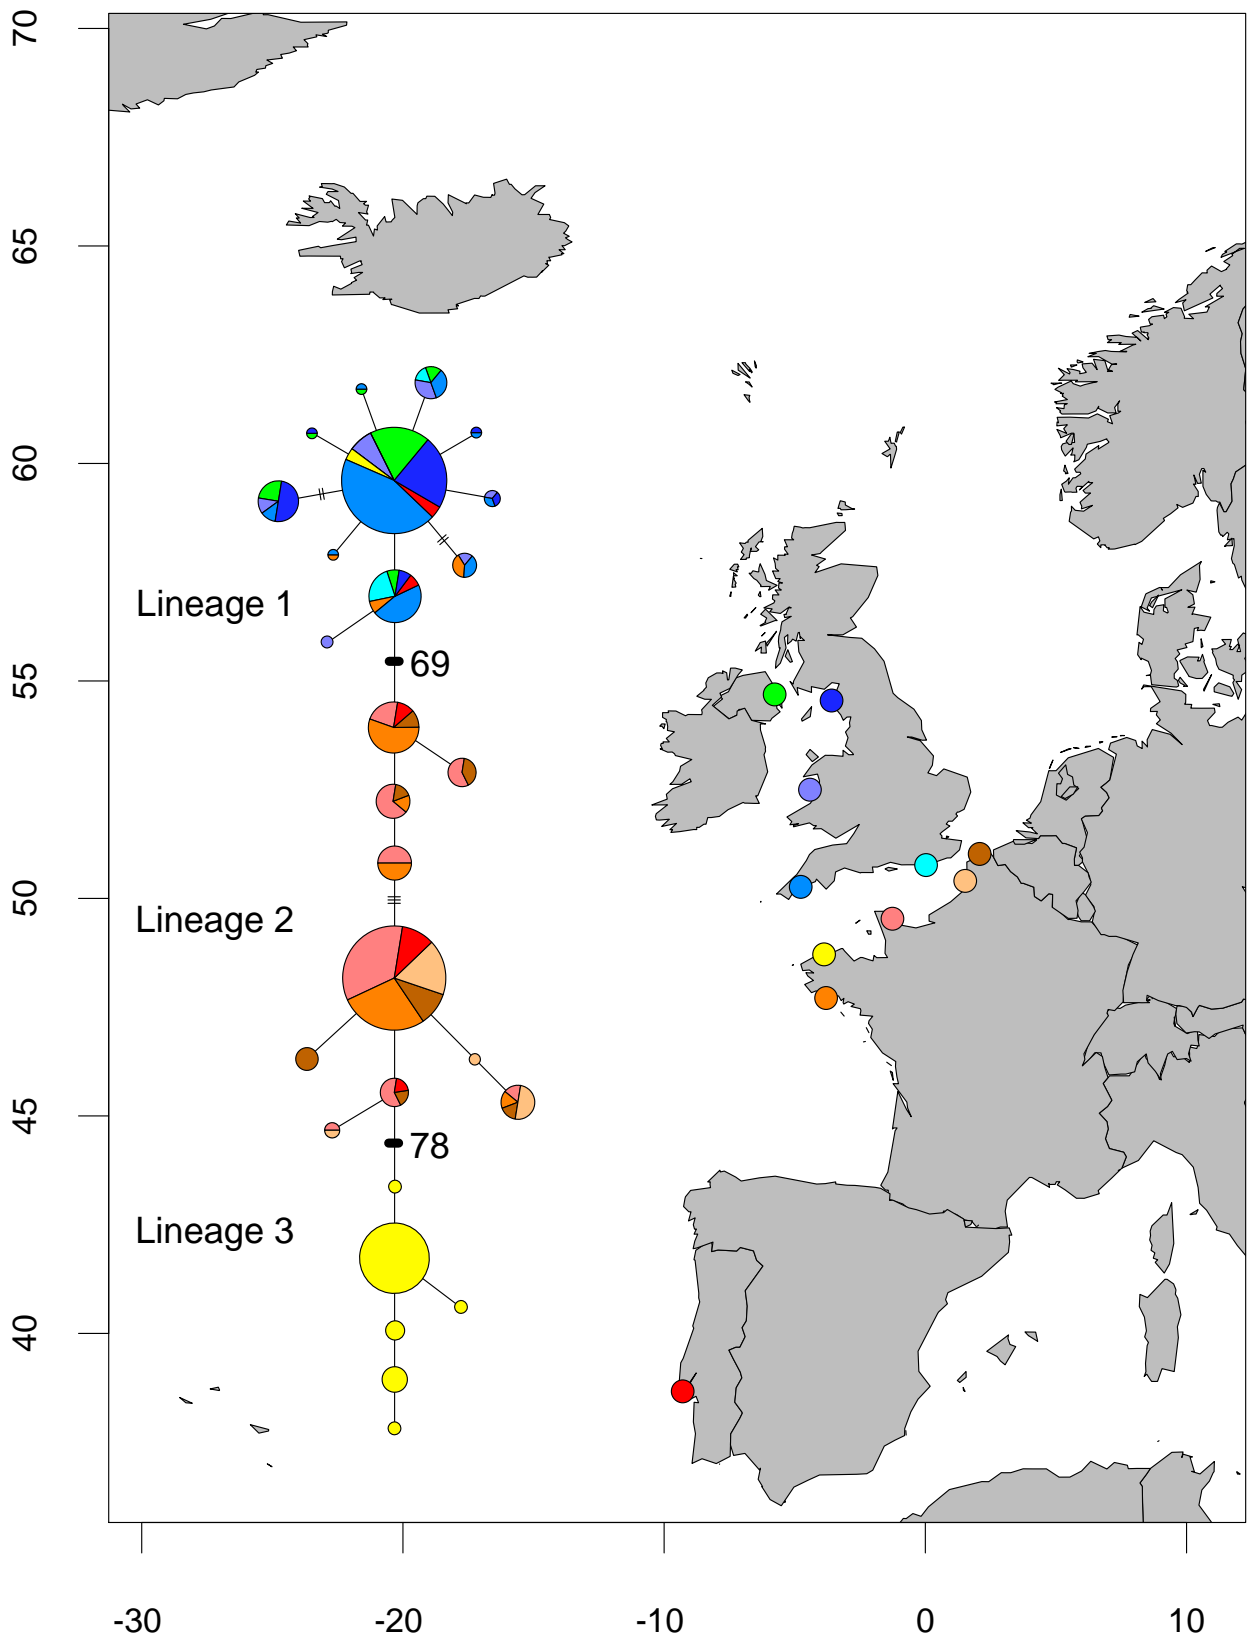

Figure 13: Only haplotypes represented by more than one sequence are shown.

# *Pomatoschistus microps*

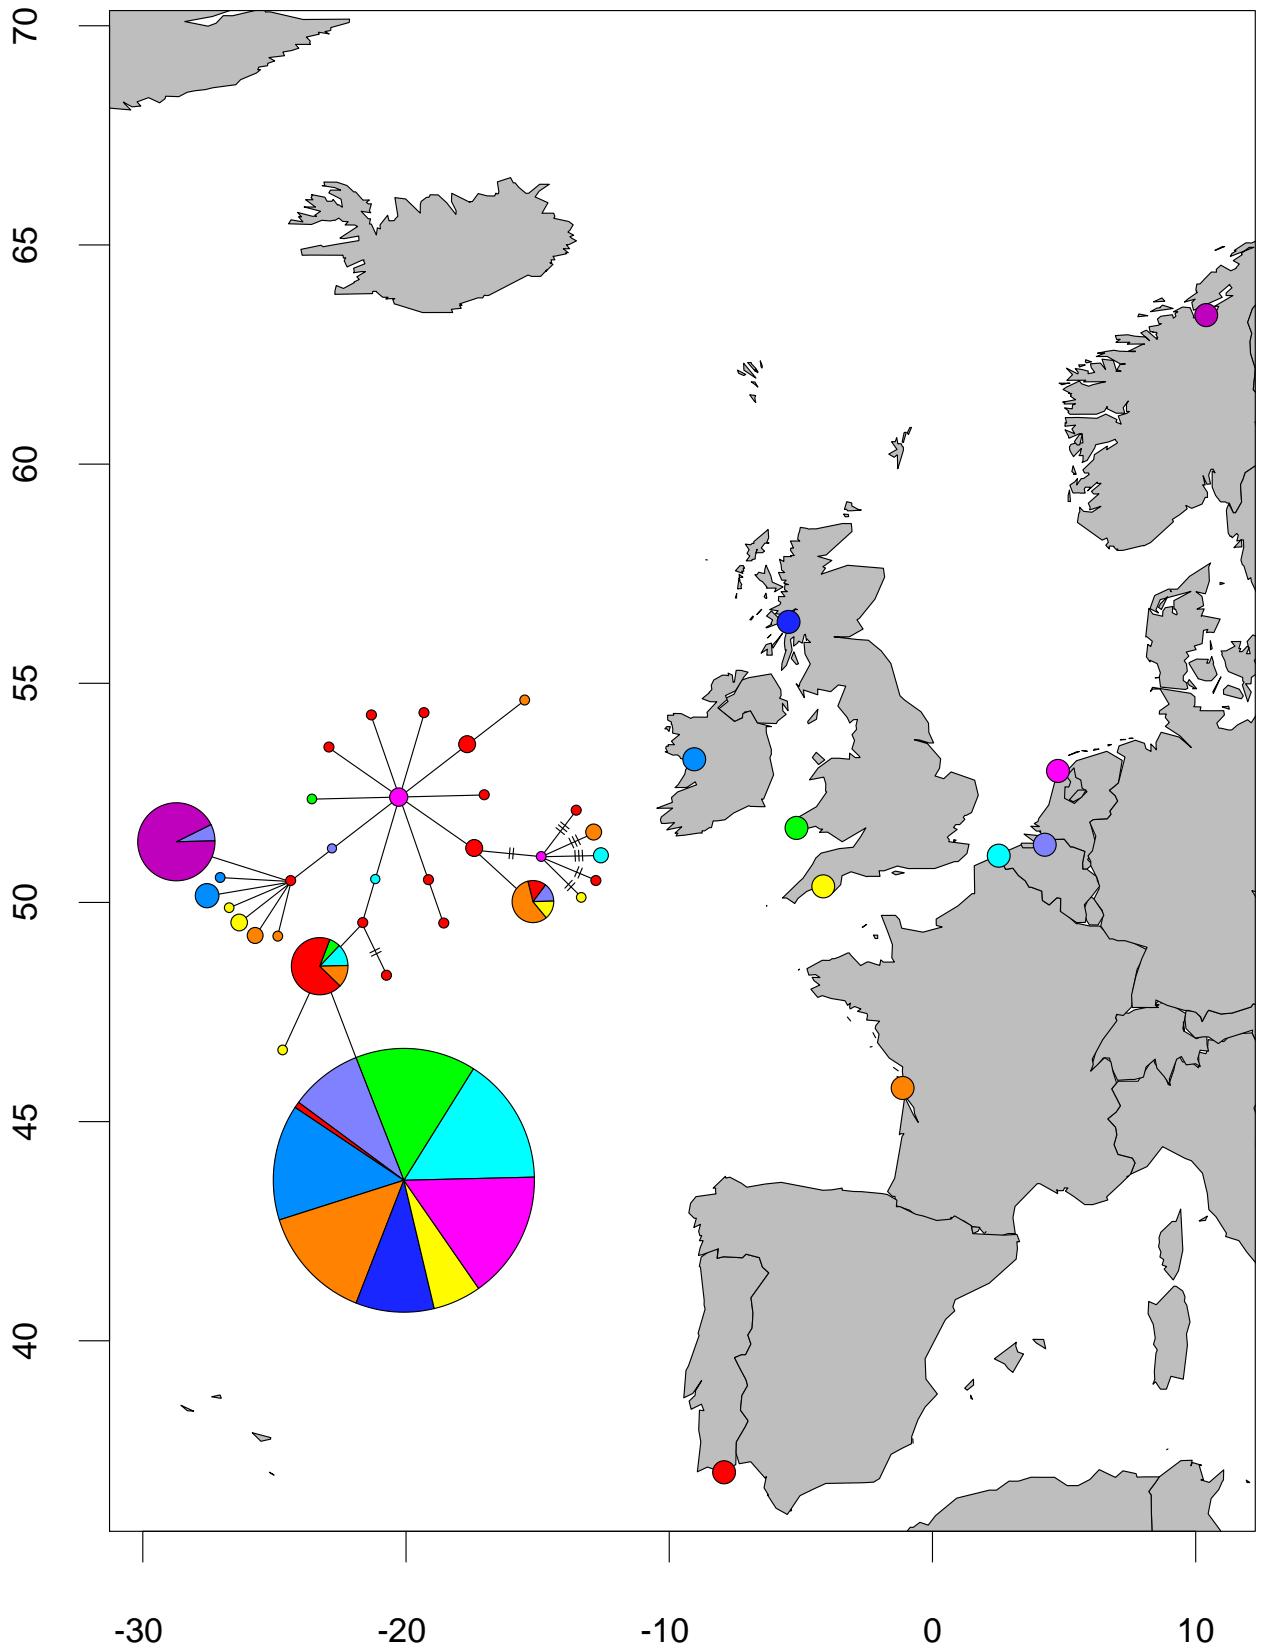

Figure 14

# *Pomatoschistus minutus*

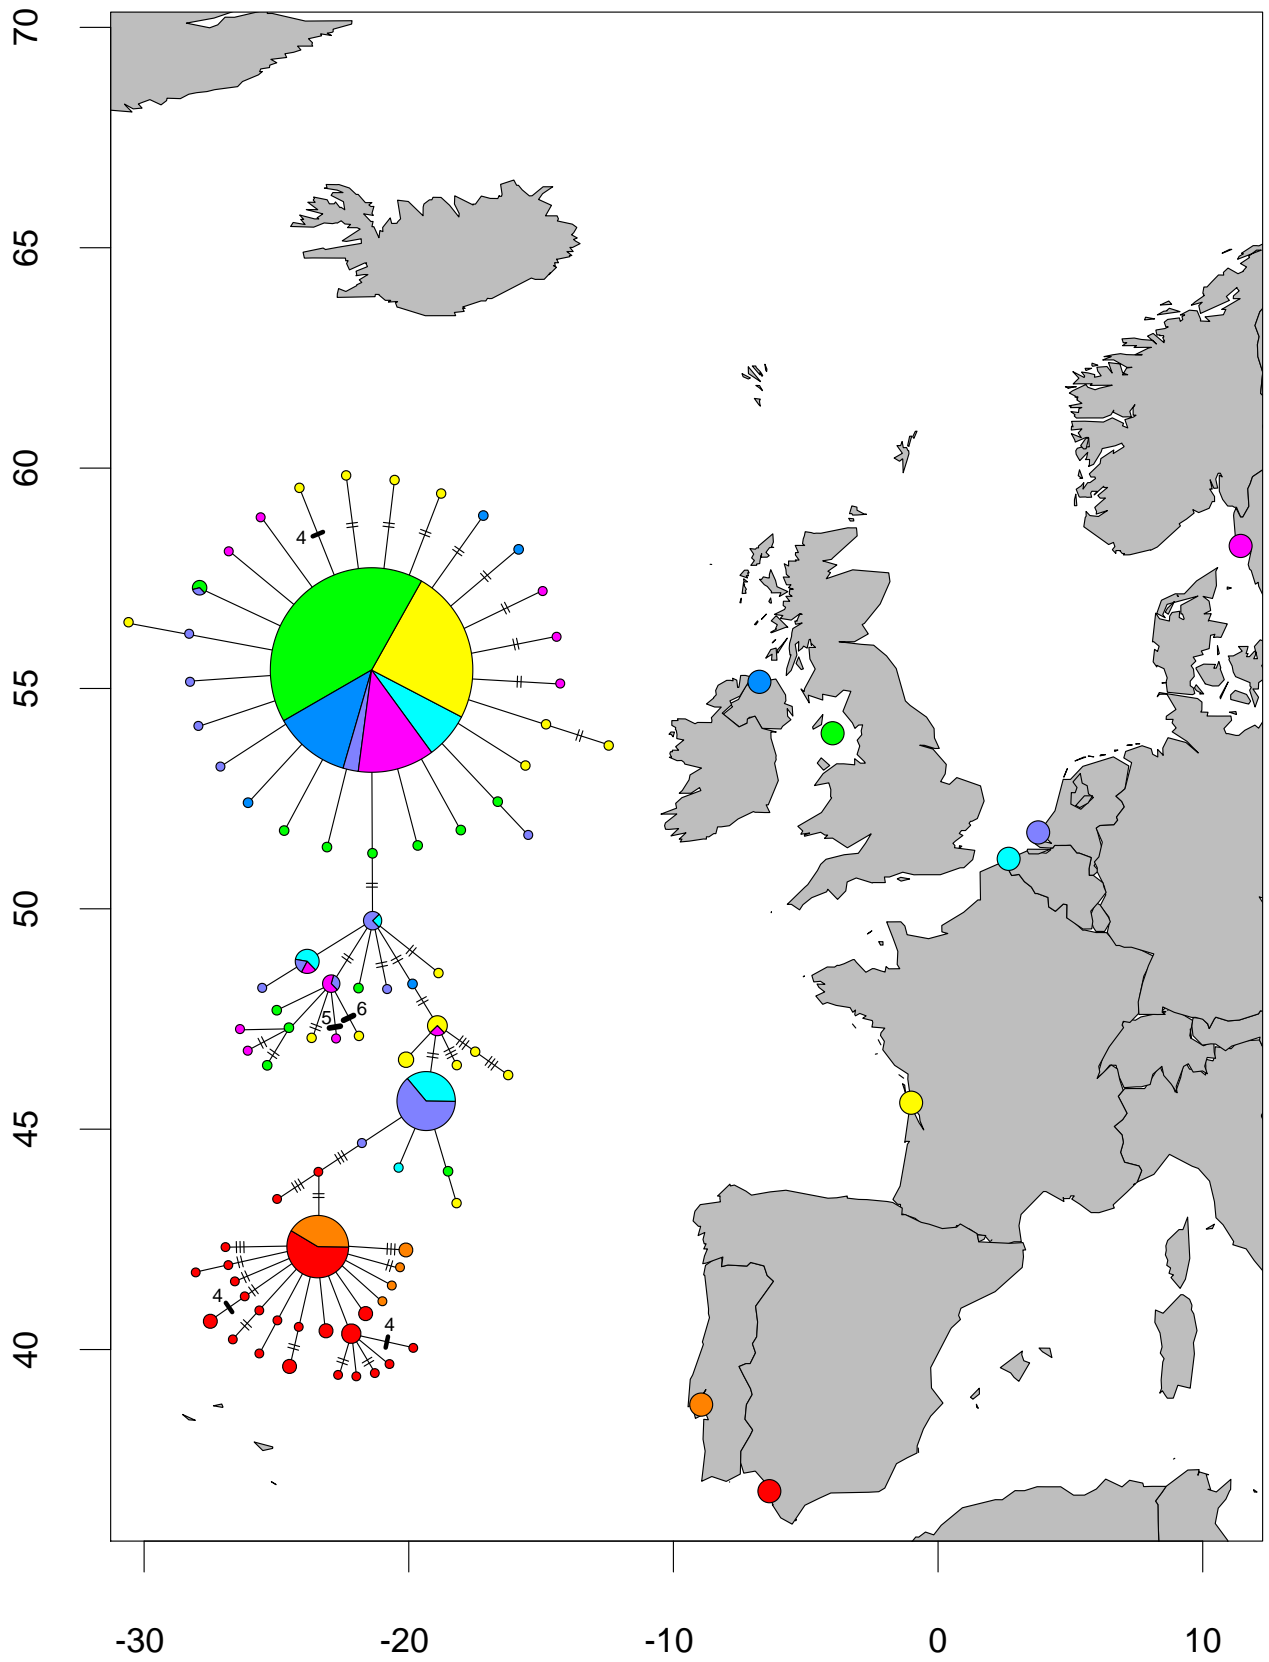

Figure 15



# *Palinurus elephas*

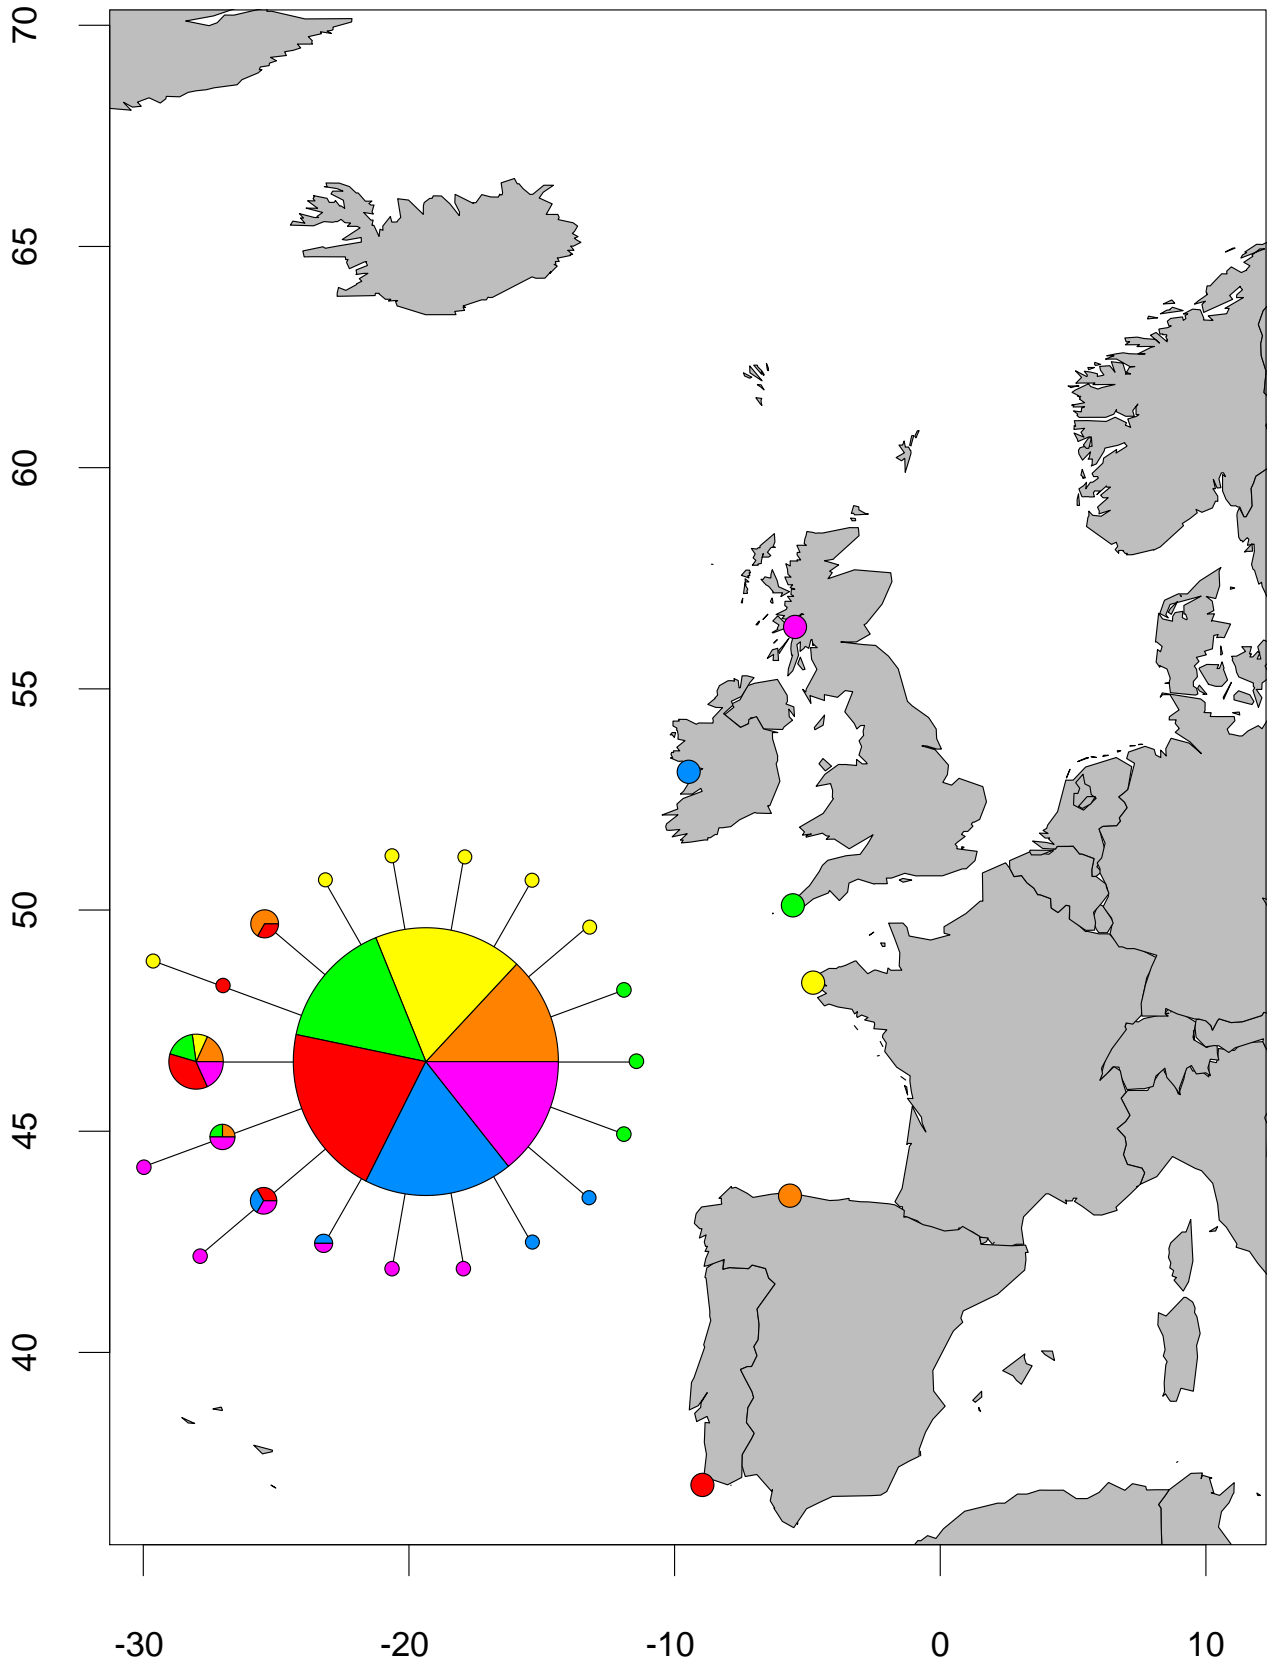

Figure 16

*Pectinaria koreni*

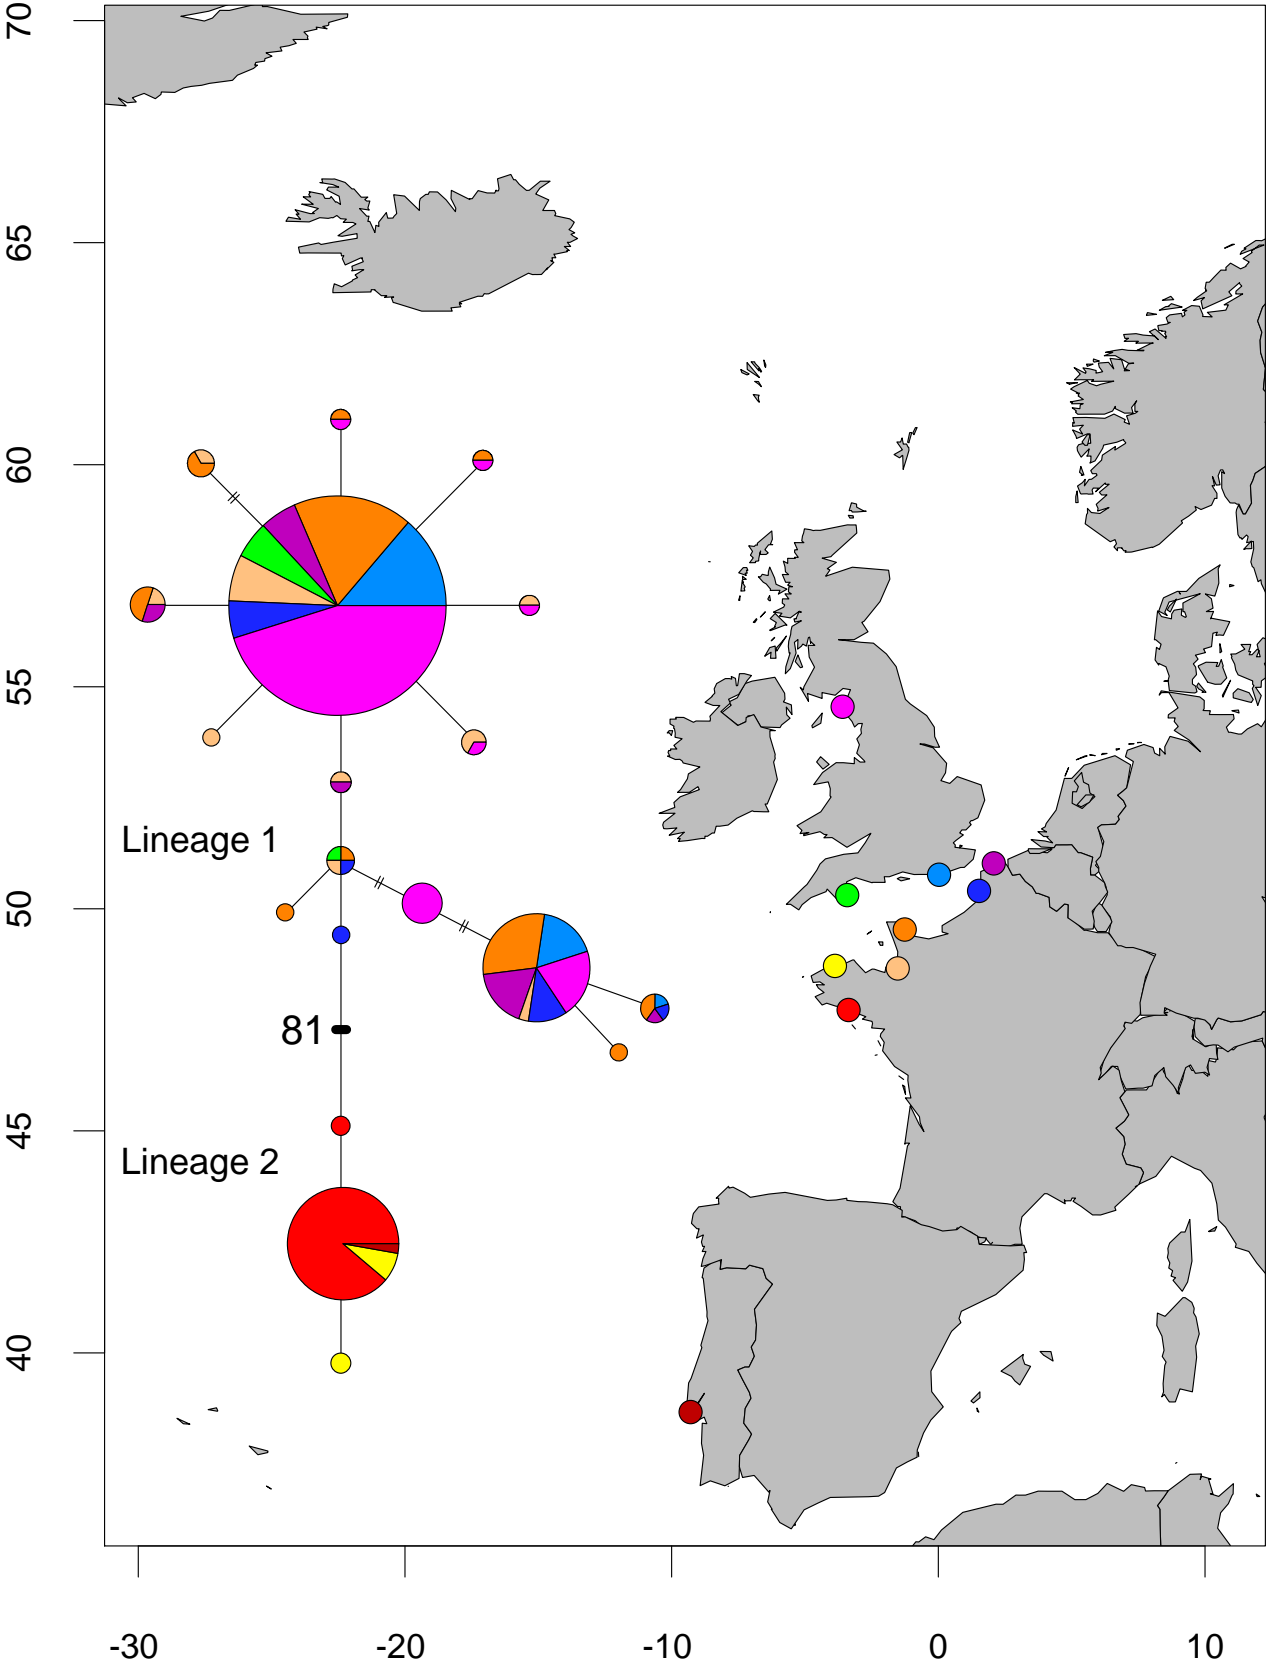

Figure 17: Only haplotypes represented by more than one sequence are shown.

*Pelvetia canaliculata*

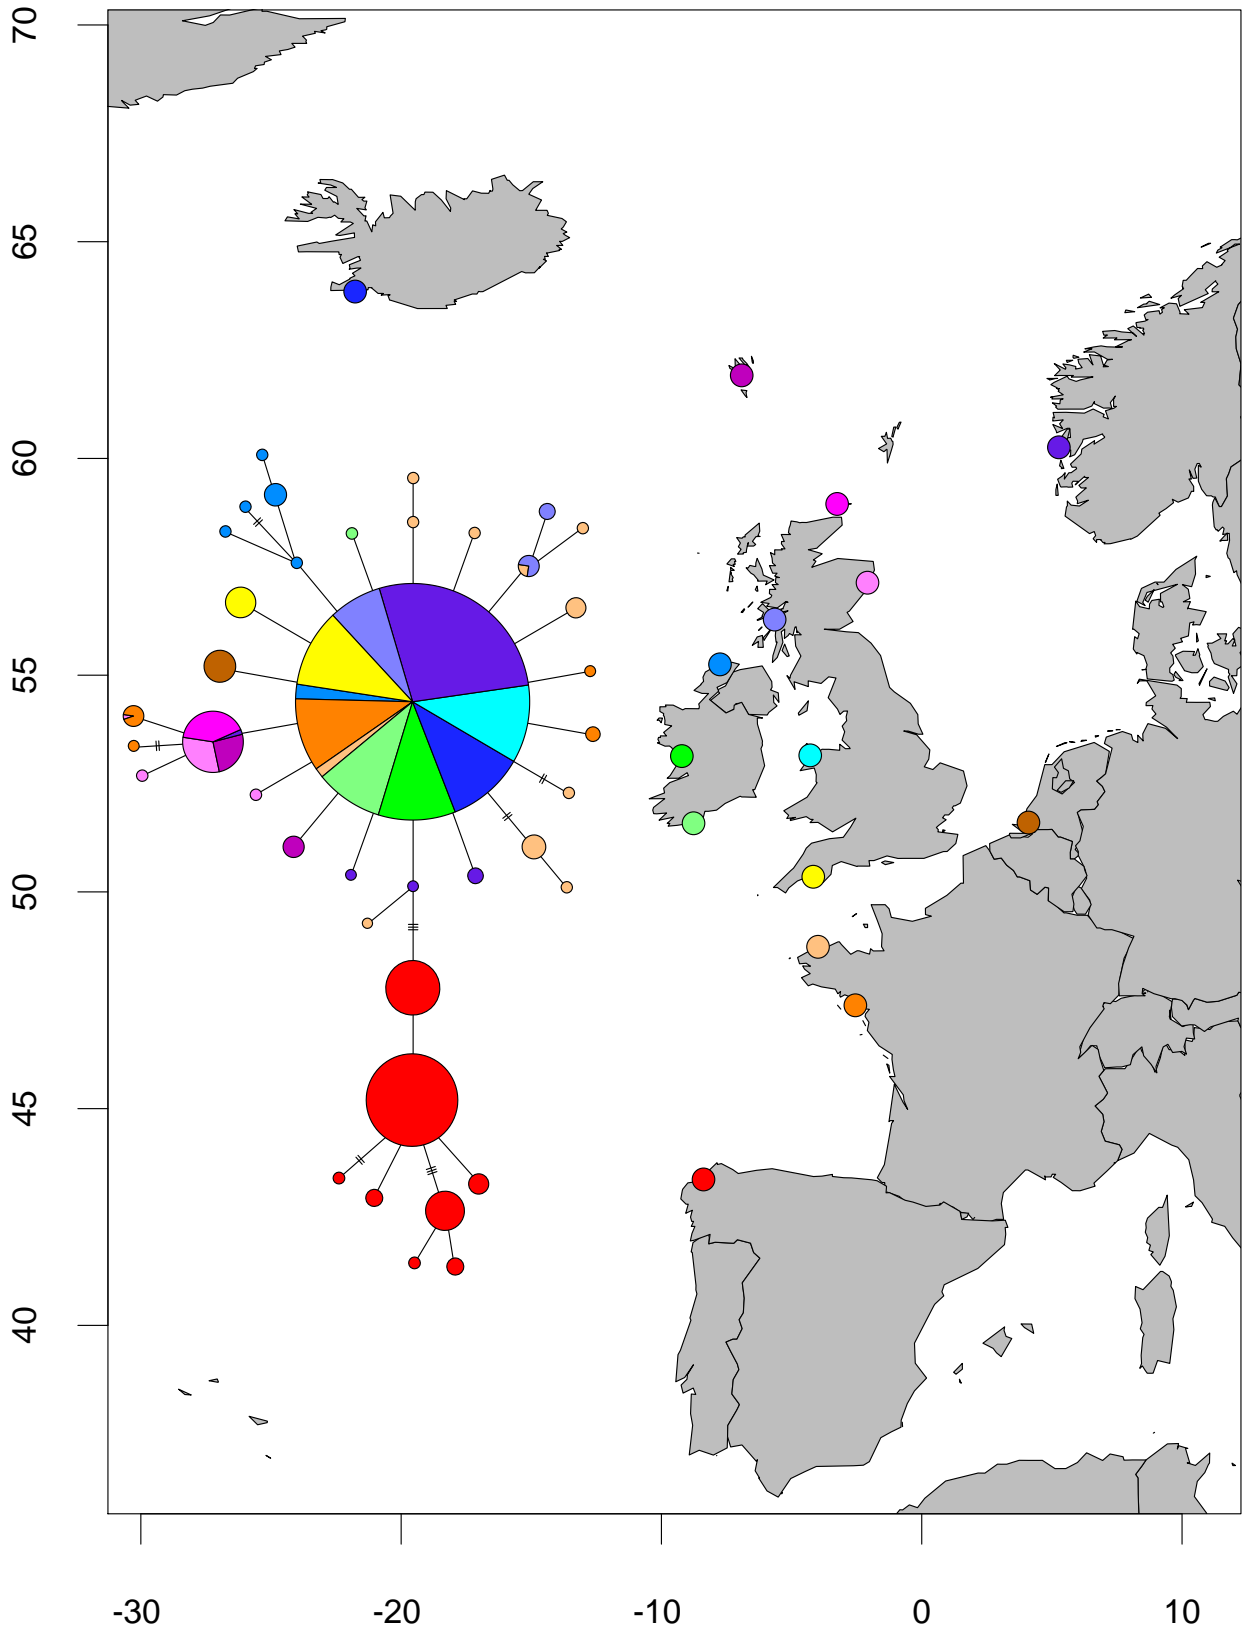

Figure 18

*Raja clavata*

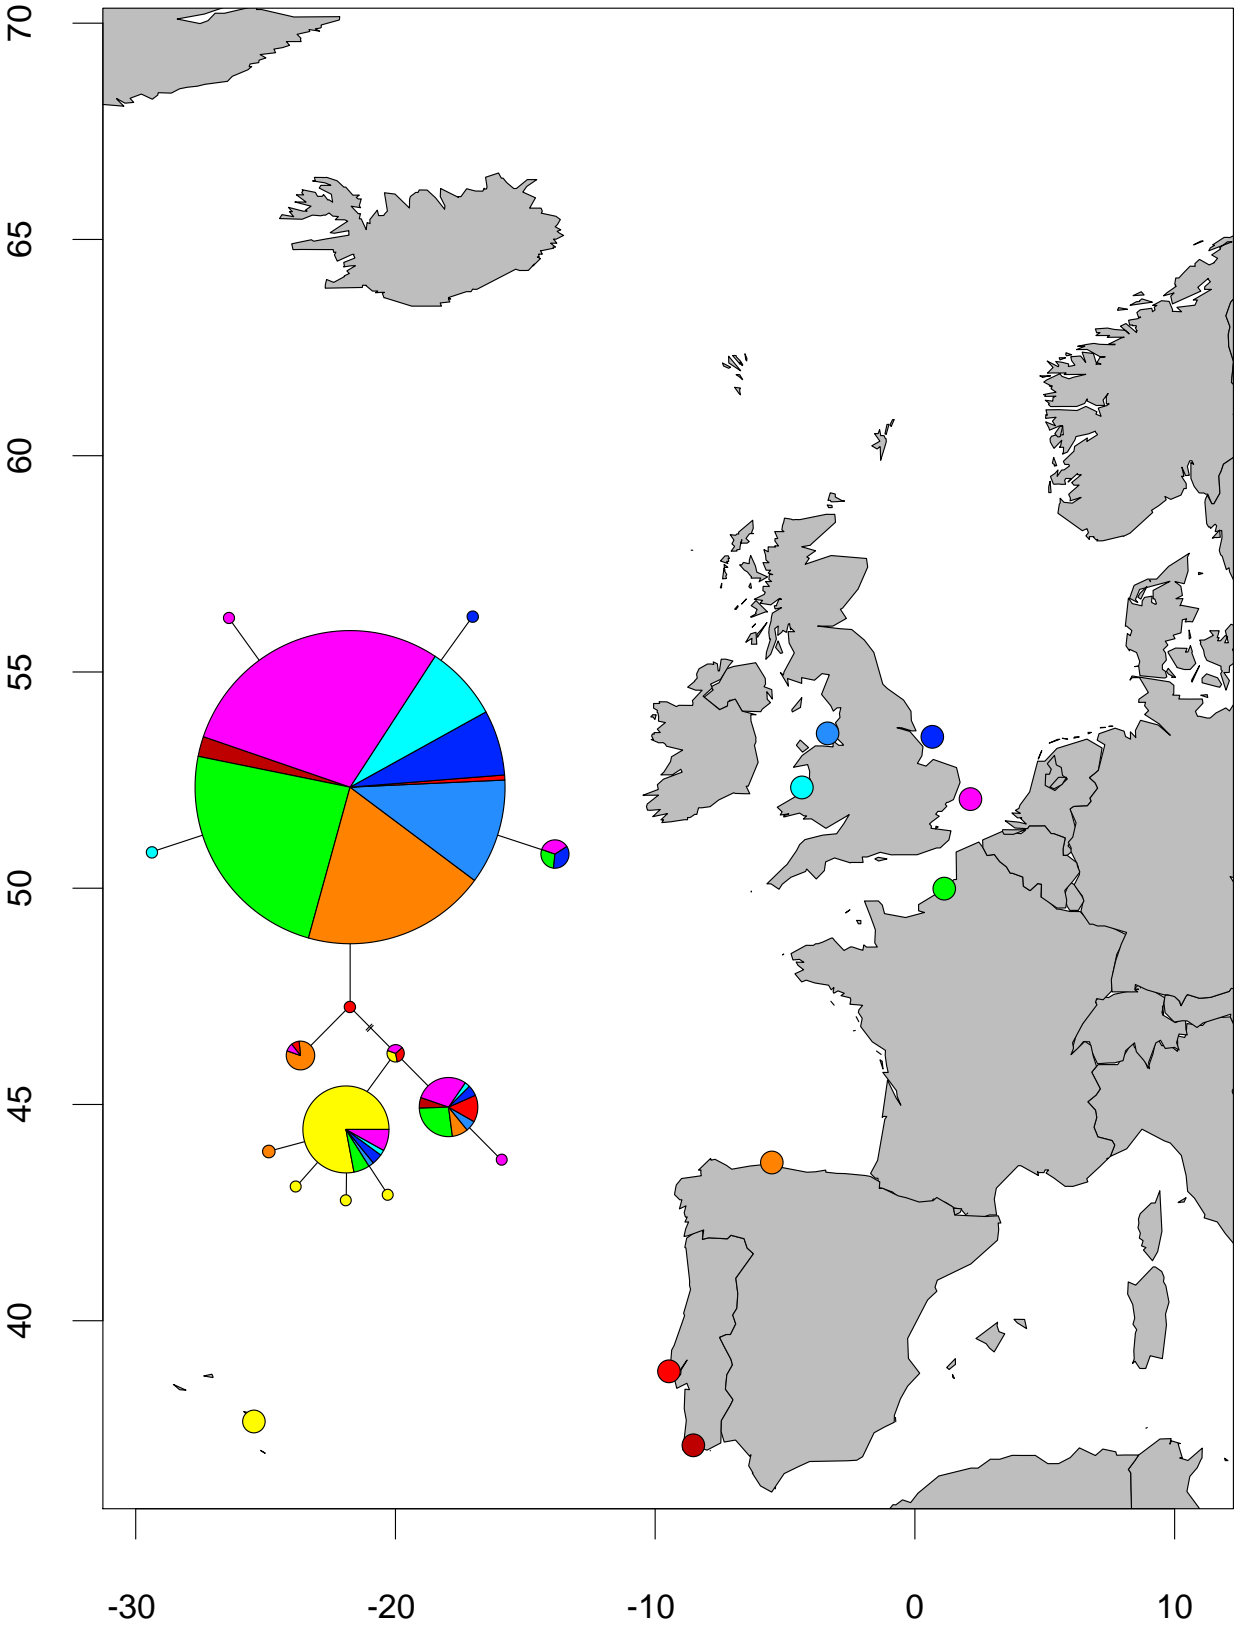

Figure 19

***Solea solea***

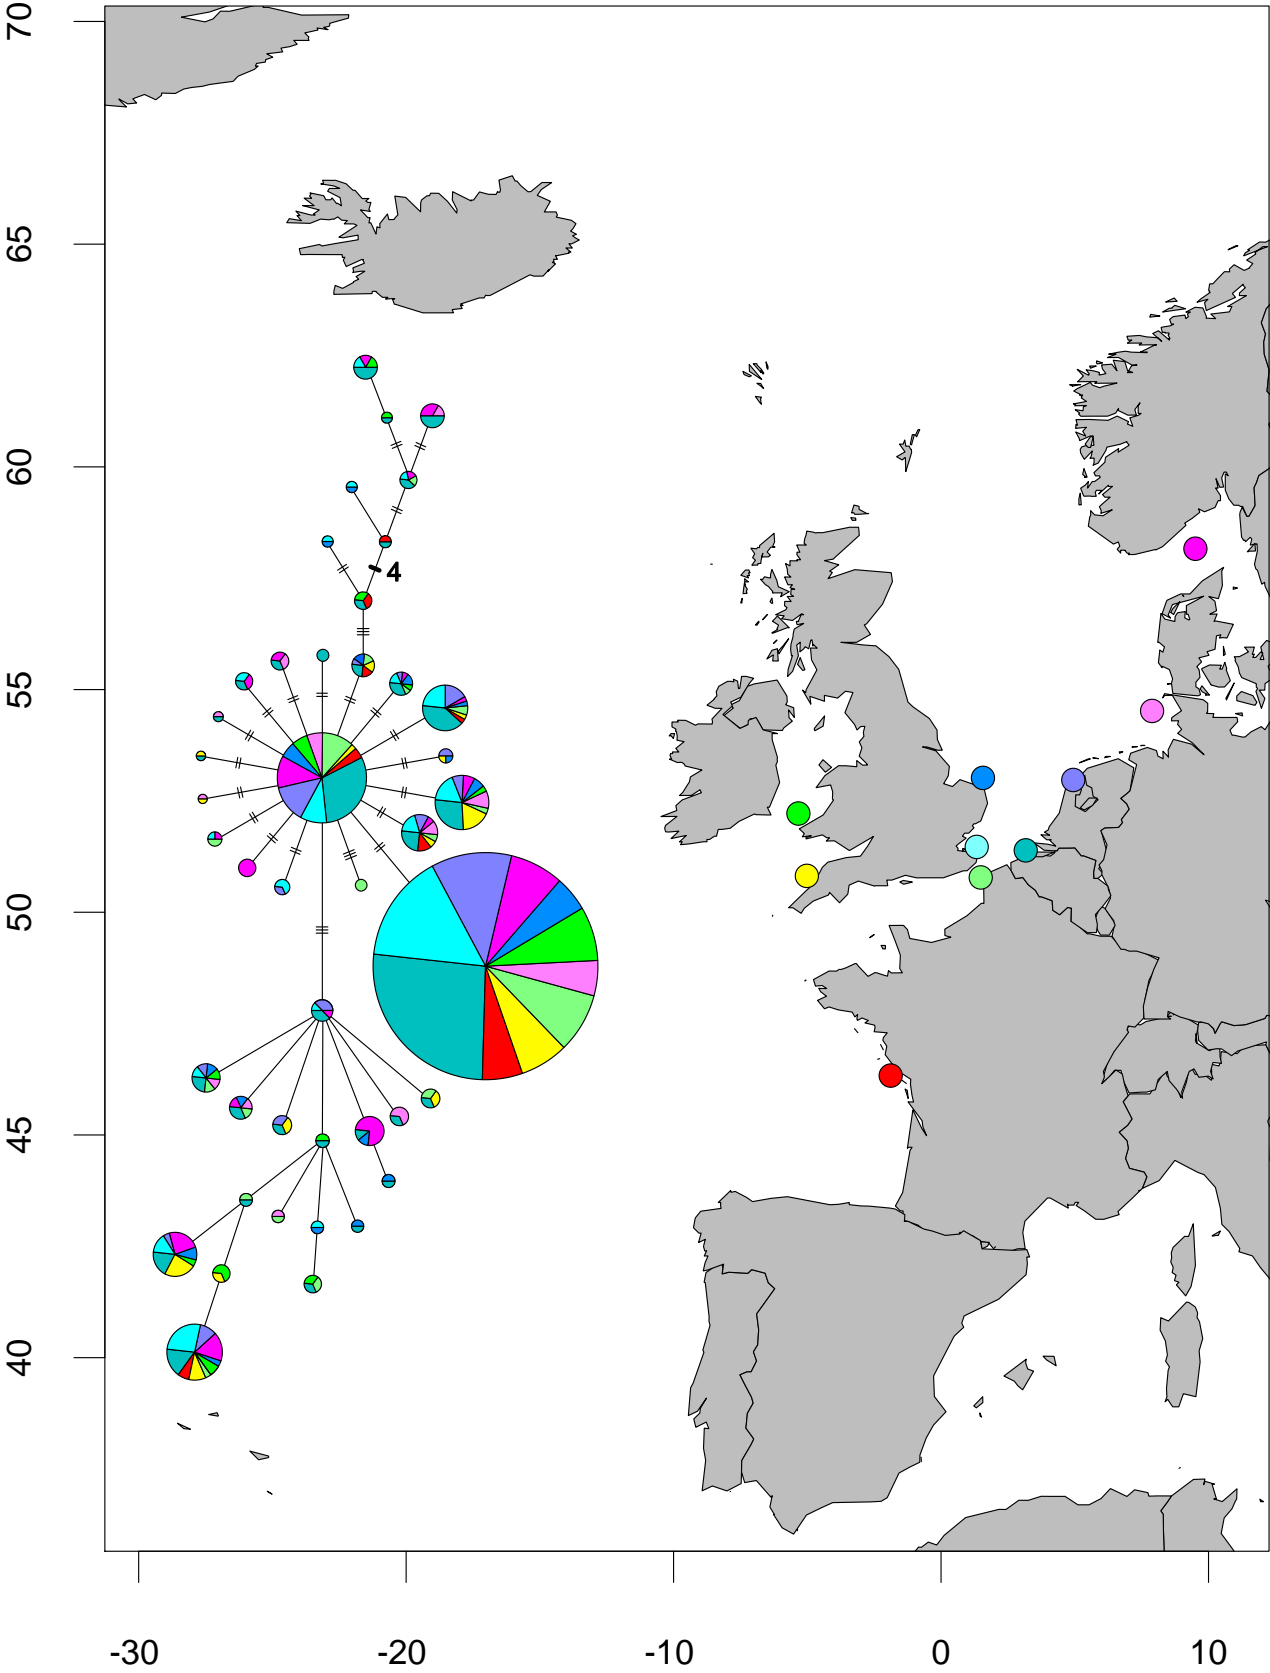

Figure 20

# *Symphodus melops*

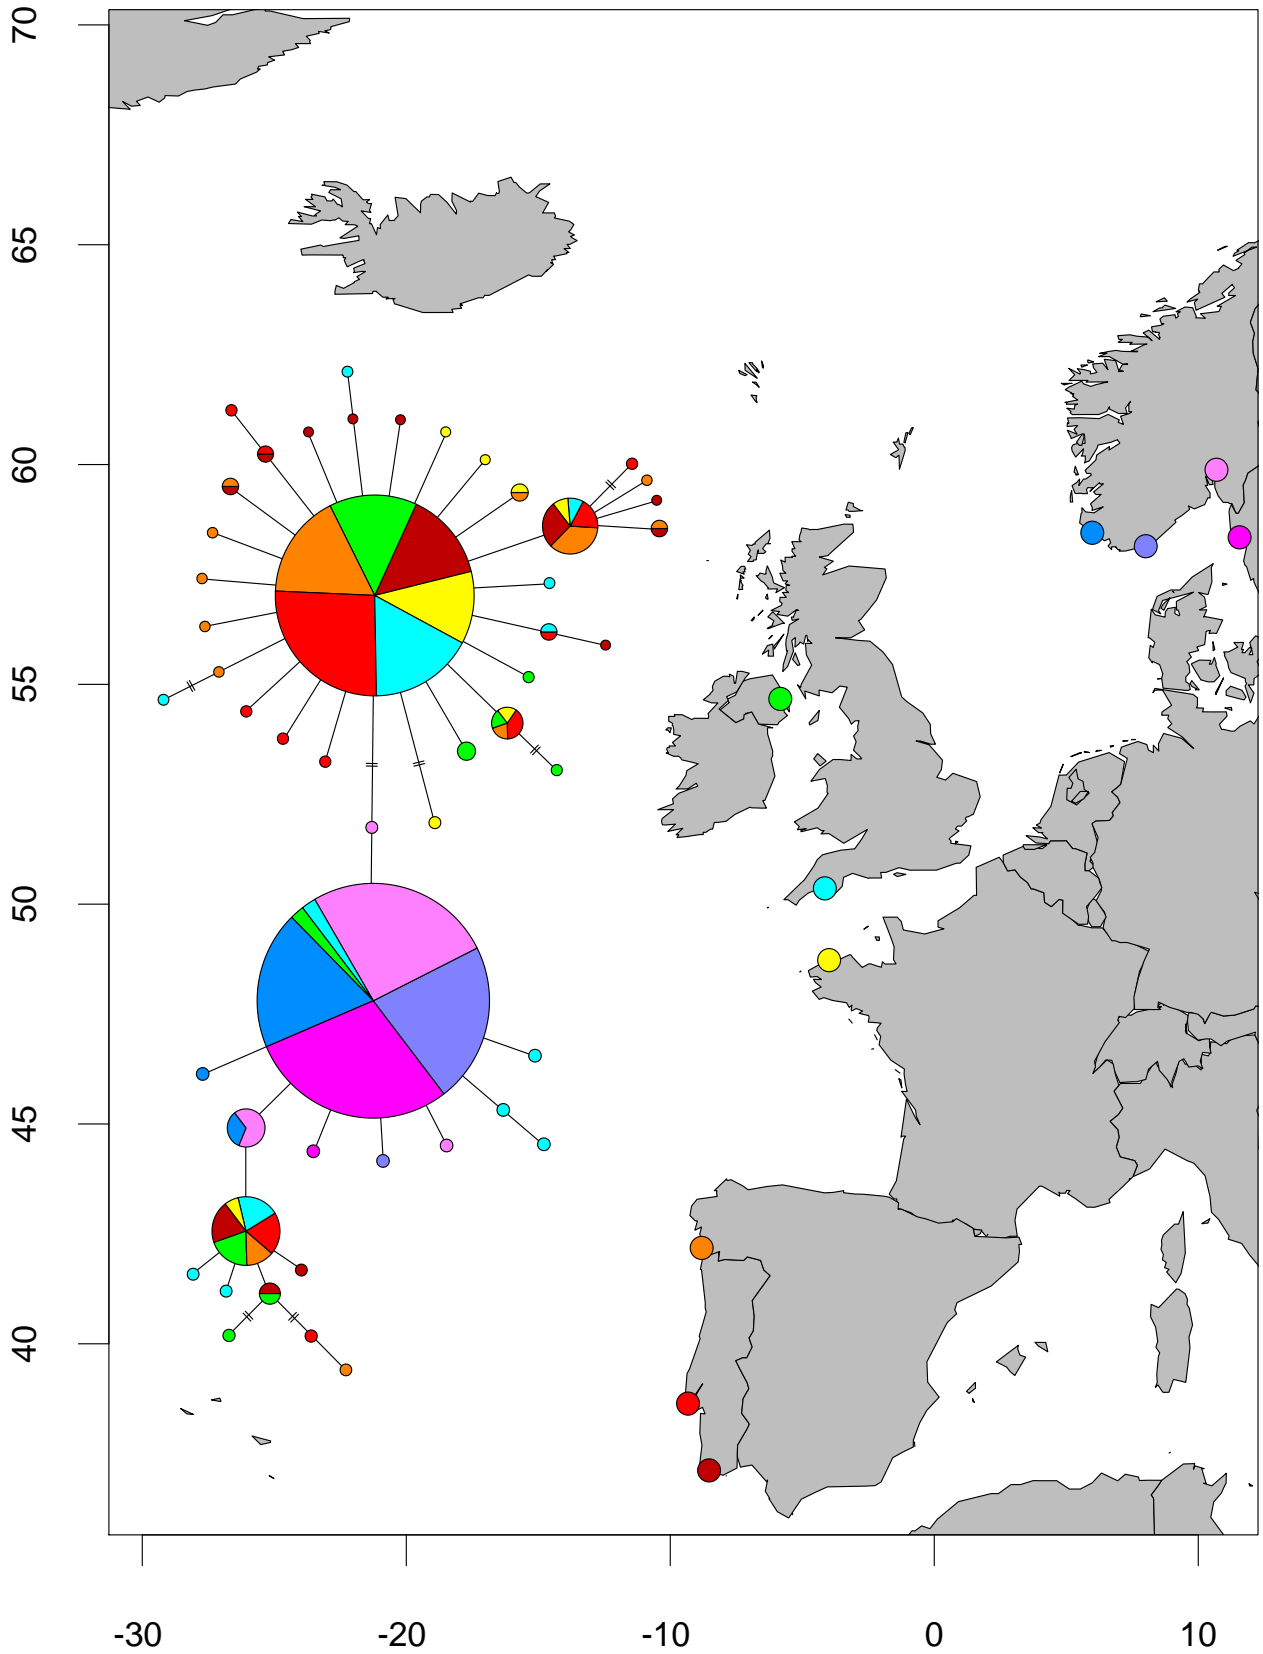

Figure 21
